# Supplementary material for: A scoping review protocol on the roles and tasks of peer reviewers in the manuscript review process in biomedical journals
Source: PubMed Central journal article supplement — BMJ Open. 2017 Oct 22;7(10):e017468. doi: 10.1136/bmjopen-2017-017468 (PMC5665269; doi:10.1136/bmjopen-2017-017468), 2017-10-22
Supplement: bmjopen-2017-017468.draft_revisions.pdf [file bmjopen-2017-017468.draft_revisions.pdf]

# BMJ Open

BMJ Open is committed to open peer review. As part of this commitment we make the peer review history of every article we publish publicly available.

When an article is published we post the peer reviewers' comments and the authors' responses online. We also post the versions of the paper that were used during peer review. These are the versions that the peer review comments apply to.

The versions of the paper that follow are the versions that were submitted during the peer review process. They are not the versions of record or the final published versions. They should not be cited or distributed as the published version of this manuscript.

BMJ Open is an open access journal and the full, final, typeset and author-corrected version of record of the manuscript is available on our site with no access controls, subscription charges or pay-per-view fees (<http://bmjopen.bmj.com>).

If you have any questions on BMJ Open's open peer review process please email [editorial.bmjopen@bmj.com](mailto:editorial.bmjopen@bmj.com)

# BMJ Open

## A scoping review protocol on the roles and tasks of peer reviewers in the manuscript review process in biomedical journals

|                                 |                                                                                                                                                                                                                                                                                                                                                                                                                                                                                                                                                                                                                                                                                                                                                                                                             |
|---------------------------------|-------------------------------------------------------------------------------------------------------------------------------------------------------------------------------------------------------------------------------------------------------------------------------------------------------------------------------------------------------------------------------------------------------------------------------------------------------------------------------------------------------------------------------------------------------------------------------------------------------------------------------------------------------------------------------------------------------------------------------------------------------------------------------------------------------------|
| Journal:                        | <i>BMJ Open</i>                                                                                                                                                                                                                                                                                                                                                                                                                                                                                                                                                                                                                                                                                                                                                                                             |
| Manuscript ID                   | bmjopen-2017-017468                                                                                                                                                                                                                                                                                                                                                                                                                                                                                                                                                                                                                                                                                                                                                                                         |
| Article Type:                   | Protocol                                                                                                                                                                                                                                                                                                                                                                                                                                                                                                                                                                                                                                                                                                                                                                                                    |
| Date Submitted by the Author:   | 25-Apr-2017                                                                                                                                                                                                                                                                                                                                                                                                                                                                                                                                                                                                                                                                                                                                                                                                 |
| Complete List of Authors:       | <p>Glonti, Ketevan; University of Split, Chair of Psychology, Faculty of Humanities and Social Sciences; Universite Paris Descartes, Centre of Research in Epidemiology and Statistics Sorbonne Paris Cité - CRESS UMR1153</p> <p>Cauchi, Daniel ; Ministry of Health Malta</p> <p>Cobo, Erik; Universitat Politècnica Catalunya, Statistics and Operational Research</p> <p>Boutron, Isabelle; Université Paris Descartes, Centre d'épidémiologie clinique; Universite Paris Descartes, Centre of Research in Epidemiology and Statistics Sorbonne Paris Cité - CRESS UMR1153</p> <p>Moher, David; Ottawa Hospital Research Institute, Centre for Journalology, Clinical Epidemiology Program,</p> <p>Hren, Darko; University of Split, Chair of Psychology, Faculty of Humanities and Social Sciences</p> |
| <b>Primary Subject Heading</b>: | Medical publishing and peer review                                                                                                                                                                                                                                                                                                                                                                                                                                                                                                                                                                                                                                                                                                                                                                          |
| Secondary Subject Heading:      | Medical publishing and peer review, Research methods                                                                                                                                                                                                                                                                                                                                                                                                                                                                                                                                                                                                                                                                                                                                                        |
| Keywords:                       | Peer review, Scoping review, Competencies, Role, Tasks, Biomedical Publishing                                                                                                                                                                                                                                                                                                                                                                                                                                                                                                                                                                                                                                                                                                                               |
|                                 |                                                                                                                                                                                                                                                                                                                                                                                                                                                                                                                                                                                                                                                                                                                                                                                                             |

SCHOLARONE™  
Manuscripts

# A scoping review protocol on the roles and tasks of peer reviewers in the manuscript review process in biomedical journals

**Authors:** Ketevan Glonti<sup>1,2</sup>, Daniel Cauchi<sup>3</sup>, Erik Cobo<sup>4</sup>, Isabelle Boutron<sup>2,5</sup>, David Moher<sup>6</sup>, Darko Hren<sup>1</sup>

<sup>1</sup> Chair of Psychology, Faculty of Humanities and Social Sciences, University of Split, Split, Croatia. [kglonti@unist.hr](mailto:kglonti@unist.hr), [dhren@ffst.hr](mailto:dhren@ffst.hr)

<sup>2</sup> Centre of Research in Epidemiology and Statistics Sorbonne Paris Cité - CRESS UMR1153, Paris, France

<sup>3</sup> Ministry of Health, Malta, [dcauchi@gmail.com](mailto:dcauchi@gmail.com)

<sup>4</sup> Statistics and Operations Research Department, Barcelona-Tech, UPC, c/ Jordi Girona 1, C5-213, 08034, Barcelona, Spain. [erik.cobo@upc.edu](mailto:erik.cobo@upc.edu)

<sup>5</sup> Université Paris Descartes, Centre d'épidémiologie Clinique, Hôpital Hôtel-Dieu, 1 place du Parvis Notre-Dame, Paris, 75004, France. [isabelle.boutron@aphp.fr](mailto:isabelle.boutron@aphp.fr)

<sup>6</sup> Center for Journalology, Clinical Epidemiology Program, Ottawa Hospital Research Institute, Ottawa, Canada. [dmoher@ohri.ca](mailto:dmoher@ohri.ca)

**Corresponding author:** Ketevan Glonti, Filozofski fakultet, Put iza nove bolnice 10c, 21000 Split, Croatia  
Email: [kglonti@unist.hr](mailto:kglonti@unist.hr)  
Tel: +385 976324635

## Abstract

**Introduction:** The primary functions of peer reviewers are poorly defined. Thus far no body of literature has systematically identified the roles and tasks of peer reviewers of biomedical journals. A clear establishment of these can lead to improvements in the peer review process. The purpose of this scoping review is to determine what is known on the roles and tasks of peer reviewers.

**Methods:** We will use the methodological framework first proposed by Arksey and O'Malley and subsequently adapted by Levac and the Joanna Briggs Institute. The scoping review will include all study designs as well as editorials, commentaries and grey literature. The following eight electronic databases will be searched (from inception to May 2017): Cochrane Library, Cumulative Index to Nursing and Allied Health Literature; Educational Resources Information Centre; EMBASE; MEDLINE; PsycINFO; Scopus and Web of Science. Two reviewers will use inclusion and exclusion criteria based on the 'Population – Concept – Context' framework to independently screen titles and abstracts of articles considered for inclusion, supplemented by an extended grey literature search. Full-text screening of relevant eligible articles will also be carried out by two reviewers.

A search of individual journal recommendations to peer reviewers will also be implemented using the strategy reported by Altman to select and screen journal websites. Journal impact factors will be used to identify the top five journals from all medical specialties and the top 15 journals for general medicine. The search strategy for grey literature will include searching in websites of existing networks, biomedical journal publishers, and organizations that offer resources for peer reviewers.

**Ethics and dissemination:** This scoping review will undertake a secondary analysis of data already collected and does not require ethical approval. The results will be disseminated through journals and conferences targeting stakeholders involved in peer review in biomedical research.

**Keywords:** Peer review, Competencies, Scoping review, Roles, Tasks, Biomedical publishing

## Strengths and limitations of this study

- The scoping review approach will cover a vast volume of literature, thus offering a ‘big picture’ on roles and tasks of peer reviewers in the manuscript peer review process in biomedical journals
- This scoping review is the first step of a broader project. It will be followed by consultation with journal editors and peer reviewers.
- As this is a scoping review, the quality of the evidence and risk of bias will not be evaluated.

## Background

The publication of peer-reviewed articles in scientific journals has long been the cornerstone of science (1), and the primary means by which new research is documented and the outcomes disseminated (2). Manuscripts that are submitted for publication in scientific journals typically undergo a critical appraisal process by researchers from a similar field who are in the wider sense peers and colleagues - known as peer review - as part of a broader editorial process led by journal editors (3). However, the importance of peer reviewing within this process extends beyond purely academic concerns. Academic publishing lies at the interface between biomedical research and practice, having the potential to influence clinical decisions (4,5). Clinical decisions should be guided by the best evidence available, yet these can be misleading if they are based on incomplete or inaccurate information. Any process that influences the accuracy, quality, assessment and dissemination of clinical evidence may therefore have a direct impact on patient care (3). The editorial process within biomedical journals can thus be considered to be a “gatekeeper” for scientific publications, consisting of the following steps:

1. Editors consider the overall ‘fit’ of the research article to the journal, as well as suitability and relevance for the journal and its readership (6)
2. Selection of reviewers by the editors: within the traditional biomedical sphere, peer reviewers are typically invited by journal editors to review manuscripts on the basis of their apparent expertise, which is often gauged in terms of their article output in their respective research area.
3. Editors communicate with both reviewers and authors and coordinate their interaction during peer review.

Editors are responsible for taking an independent decision regarding the fate of the manuscript (i.e. whether it is accepted for publication or not) (7). However, it has been suggested that journal editors are not entirely independent in their assessment of an article’s suitability for publication once it has undergone peer review. Research indicates that editors give considerable weight to reviewers' recommendations on whether to reject or accept a manuscript (8). This may in part be due to the fact that core competencies for scientific editors in biomedical research have not yet been formally established (9), and most scientific editors of biomedical journals do not receive formal training (10). This is also the case for the majority of reviewers. Despite a significant proportion of reviewers perceiving that they need guidance and formal training on how to conduct a peer review (11), most are not trained in how to write a reviewers’ report. Instead, reviewing is often a skill learnt through feedback received on their own submitted manuscripts (12). Furthermore, since it is rare for reviewers to receive feedback on their own reviewer reports, it is difficult for them to know whether their reviews are of good quality (13).

Although journals, authors and reviewers widely support peer review as the primary tool for evaluating research outputs in biomedical research (11,14,15), there is concurrently a broad consensus across scientific

1  
2  
3 disciplines that the peer review process may be flawed (12,16,17). A growing body of literature has  
4 identified several potential problems including misjudgment by editors, and biased, inconsistent or  
5 inadequate reviewing by reviewers (17).  
6

7 Over the years, there have been various attempts to improve the quality of peer reviewer reports in  
8 biomedical science. A recent systematic review evaluating the impact of interventions aimed at improving  
9 the quality of peer review of Randomized Controlled Trials (RCTs) for biomedical publications concluded  
10 that there is a need to clarify the roles and tasks of peer reviewers as a step forward in quality improvement  
11 of peer reviewing (18). Within the biomedical field, the apparent roles and tasks of peer reviewers are  
12 closely related to the structural properties of the editorial process itself. For example, some - but not all -  
13 journals require peer reviewers to assess novelty and/or clinical relevance of articles in addition to assessing  
14 scientific rigor. Journals also differ with regards to their expectations of how a reviewer report should be  
15 written. Some journals encourage reviewers to follow a specific structure in their reporting, whereas other  
16 journals prefer free text. Journals also differ in their request for peer reviewer recommendations regarding  
17 whether an article should be accepted for publication in the journal or not.  
18

19 These differences may influence quality of peer review reporting, and thus quality of the peer review  
20 process across journals. An RCT aimed at determining the effects of training peer reviewers found only a  
21 slight positive impact on the quality of peer review. After receiving training, the quality of the peer  
22 reviewers' reports as measured by the 'Review Quality Instrument' that assesses the extent to which a  
23 reviewer has commented on five aspects of a manuscript (importance of the research question, originality of  
24 the paper, strengths and weaknesses of the method, presentation, interpretation of results) and on two  
25 aspects of the review (constructiveness and substantiation of comments), was deemed to have improved  
26 overall. However, peer reviewers in the study failed to detect all major errors that were introduced to the  
27 articles under review (19). At the same time, a major criticism of this study was that reviewers do not  
28 necessarily think that their task is to find all major errors in an article (20). This dissonance was also  
29 reflected in a recent study that showed that the most important tasks in peer review, as perceived by peer  
30 reviewers evaluating RCTs, were not congruent with the tasks most often requested by journal editors in  
31 their guidelines to reviewers (21).  
32

33 These differences clearly illustrate the need to clarify the roles and tasks of peer reviewers. Thus far, this  
34 has only been somewhat explored, to a limited extent, for RCTs (21) but not for other study designs.  
35

36 The primary objective of this research is to determine the specific roles and tasks of peer reviewers as  
37 depicted in biomedical research. The wider purpose of this research is to inform and facilitate the future  
38 development of a set of core tasks that should be (asked of peer reviewers) carried out by peer reviewers.  
39 This will contribute to improvements in the quality of peer reviewer reports, and ultimately of the  
40 biomedical scientific literature in general.  
41  
42  
43  
44  
45  
46  
47

### 48 *Methods*

49 A scoping review was considered to be the most suitable approach to responding to the broad aim of this  
50 study. In contrast to systematic literature reviews that aim to answer specific questions, scoping reviews  
51 have been described as a process of producing a broad overview of the field (22–24). This will be achieved  
52 through a scoping review of both published biomedical journal articles and grey literature. Grey literature  
53 will be searched because it is likely that most of the information being sought (i.e. descriptions of the roles  
54 of peer reviewers) would be found in calls for reviewers on journal websites; and guidance documents – all  
55 of which would not generally be captured in a traditional review of published research. This approach has  
56  
57  
58  
59  
60

1  
2  
3 been previously adopted by authors of a study that aimed to identify competencies of scientific editors of  
4 biomedical journals (9).

5  
6 This scoping review will use the methodological framework proposed by Arksey and O'Malley (22), as  
7 well as the amendments made to this framework by Levac (25) and by the Joanna Briggs Institute (26). The  
8 framework consists of six consecutive stages: 1. Identifying the research question 2. Identifying relevant  
9 studies, 3. Study selection, 4. Charting the data 5. Collating, summarizing, and reporting results and 6.  
10 Consultation. Each stage is discussed in further detail below.  
11

### 12 13 Stage 1: Identifying the research question

14 Arksey and O'Malley suggest an iterative process for developing one or more research questions. In the  
15 first stage two research questions have been identified based on gaps in the literature:

- 16 1. What are the expected roles of peer reviewers in the editorial peer review process in biomedical  
17 journals?
- 18 2. What are the range of tasks that peer reviewers are expected to perform for biomedical journals?  
19

20  
21 These questions might be refined, or new ones added, as the authors gain increasing familiarity with the  
22 literature.  
23

### 24 25 Stage 2: Identifying relevant studies

26 A comprehensive search strategy will be developed in order to identify relevant literature, underpinned by  
27 key inclusion criteria (see Box 1). These are based on 'Population – Concept – Context (PCC)' framework  
28 recommended by the Joanna Briggs Institute for scoping reviews (26), which has roots in the PICO  
29 (Population, Intervention, Comparator and Outcome) framework commonly used to focus clinical questions  
30 and develop systematic literature search strategies (27).  
31  
32  
33  
34

#### 35 36 Box 1 Inclusion criteria

|    |                |                                                                                                                                                                                                            |
|----|----------------|------------------------------------------------------------------------------------------------------------------------------------------------------------------------------------------------------------|
| 37 | P – Population | = Journal editors, publishers, peer reviewers, (corresponding) authors in biomedical journals, and organizations that offer (educational) resources and training to peer reviewers in the biomedical field |
| 38 | C – Concept    | = Articles with specific focus and/or statements mentioning roles, tasks, competencies pertaining to the role of peer reviewers in the journal editorial process.                                          |
| 39 | C – Context    | = The review will include all study designs as well as book chapters, editorials and commentaries from the biomedical field. There will be no date and language restrictions.                              |

#### 40 41 Exclusion criteria

42 Studies referring to peer review that is not related to manuscript peer reviewing in biomedical journals (e.g.  
43 grant peer review, professional performance review, peer review of teaching etc.) were excluded.  
44

#### 45 46 Search strategy

47 The electronic literature search strategy will follow the three-step process recommended by the Joanna  
48 Briggs Institute (26). The first step consists of an initial preliminary search of at least two online databases  
49  
50  
51  
52

1  
2  
3 relevant to the topic. This was undertaken for MEDLINE (via Ovid) using the “peer review, research”  
4 Medical Subject Headings (MeSH) and ‘peer review’ key word in the Cochrane Library resulting in 2,017  
5 studies in CDSR and 13,717 in MEDLINE. In the second step an analysis of relevant text words in titles  
6 and abstracts of a number of relevant papers, and of index terms used to describe the articles will be  
7 performed. The identified keywords and index terms as well as search strategies from existing scoping and  
8 systematic reviews on peer review (9,21,28) will be used to develop database-specific search strategies. The  
9 Peer Review of Electronic Search Strategies (PRESS) 2015 Guideline statement will be used to guide the  
10 electronic literature search strategies (29). These will be further refined in collaboration with a Health  
11 Sciences Librarian. Subsequently, the following databases will be searched: Cochrane Database of  
12 Systematic Reviews (CDSR), Cumulative Index to Nursing and Allied Health Literature (CINAHL);  
13 Educational Resources Information Centre (ERIC); EMBASE (via Ovid); PsycINFO (via Ovid);  
14 MEDLINE (via Ovid), Scopus and Web of Science. The search strategy for MEDLINE can be found in the  
15 online supplementary (Appendix 1).  
16

17  
18  
19 There will be no time or language restrictions. The authors involved in this protocol are in command of the  
20 following languages: Catalan, Croatian, English, French, German, Italian, Russian, and Spanish. Relevant  
21 articles identified in any other language will be translated.  
22

23 In the third and last step the reference lists of included studies as well as websites of journals such as  
24 JAMA, who has been the host of the Peer Review Conference and published papers from the congress, and  
25 Nature and Science that display a strong interest in peer review - as evidenced by numerous publications on  
26 the topic - will be hand searched using key words related to peer review, as outlined in the MEDLINE  
27 strategy (i.e. ‘peer review’) to identify any additional literature that was not detected by the search strategy.  
28 In addition, an extended scoping search and data-abstraction of journal guidelines to peer reviewers and of  
29 relevant grey literature will be implemented. Individual journal websites will be searched for statements  
30 mentioning roles, tasks, skills, and behaviors. Journals will be selected using the strategy by Altman (30):  
31 journal impact factors will be used to identify the top five journals from all medical specialties and the top  
32 15 journals for general medicine and their websites will be screened. In his study Altman as well as the  
33 2014 update (31) refer to 33 medical specialties. It is expected that further specialties have emerged since  
34 2005, therefore we will search for specialist journals for each medical specialty recognized in the Directive  
35 2005/36/EC of the European Parliament and of the Council of 7 September 2005 (on the recognition of  
36 professional qualifications and search for specific journals) using 2015 journal impact factors (Thomson  
37 Reuters Journal Citation Reports-Science Citation Index Expanded), to ensure that all medical specialties  
38 are covered. It is expected that some journals may directly communicate their instructions to peer reviewers  
39 via email or through their submission systems, rather than through publicly available instructions. In order  
40 to obtain the content of such instructions for examination we will an email to the editor-in-chief and/or  
41 managing editor of the identified journals. The email will describe the study and request details of any  
42 ‘direct to reviewer’ guidance.  
43

44 The search strategy for grey literature will include searching in websites of existing networks (i.e.  
45 EQUATOR Network, New Frontiers of Peer Review (PEERE)), biomedical journal publishers (i.e. BMJ  
46 Publishing Group, Elsevier, Springer Nature, Taylor & Frances, Wiley), and organizations that offer  
47 resources for reviewers (including educational courses, for example those provided by Cochrane (32)) and  
48 Publons (33)) Relevant blogs, newsletters (i.e. The METRICS Research Digest (34)), surveys and reports of  
49 authors/reviewer workshops will also be considered.  
50  
51  
52  
53  
54  
55  
56  
57  
58  
59  
60

### Stage 3: Study selection

Following the execution of the search strategy, the identified records (titles and abstracts) will be collated in a reference manager for de-duplication. The final unique set of records will be imported into a systematic review paper manager that facilitates independent screening and logs disagreements between reviewers.

The study selection process will be implemented over two stages. The first stage will involve the screening of titles and abstracts by two reviewers (K.G. and D.C.) to determine each article's eligibility for full text screening based on *a-priori* inclusion criteria. The second stage of the selection process will consist of retrieving the full text of all potentially eligible articles, which will also be independently screened. Disagreements between reviewers regarding eligibility will be resolved by a third member of the research team (D.H.). Data will also be extracted independently by K.G. and D.C.

An adapted version of the PRISMA flow diagram will be used to report final numbers in the resulting study publication once the review is completed. Reasons for exclusion will be recorded at the full-text review stage.

### Stage 4: Charting the data

A draft charting form (see Table 1) has been developed at the protocol stage to aid the collection and sorting of key pieces of information from the selected articles. It will be pilot-tested and refined during the full-text screening to capture detailed information on each study. The information from research based and non-research based publications will be collected in separate extraction forms. Additional categories that may emerge during data extraction will be added accordingly.

Another form will be developed for the extraction of information from the journal guidelines to peer reviewers. In addition to the general and specific descriptions of expectations and competencies of peer reviewers, variations according to journals and their peer review models (such as: single-blind peer review, double-blind peer review, open peer review, post-publication peer review) and whether peer reviewers have to provide specific recommendations (i.e. no revision, minor revision, major revision, reject) will be noted.

Table 1 Draft data charting form

| Study characteristics                                                                | Extracted data                                                                                                                                                       |
|--------------------------------------------------------------------------------------|----------------------------------------------------------------------------------------------------------------------------------------------------------------------|
| General information                                                                  | First author' last name<br>Journal<br>Publication year<br>Study design<br>Publication type: journal article, editorial, conference abstract, grey literature, report |
| Definition of peer review                                                            | Underlying definition and conceptualization of the peer review process                                                                                               |
| General and specific descriptions of expectations and competencies of peer reviewers | Abilities<br>Knowledge<br>Roles<br>Tasks<br>Training<br>Skills                                                                                                       |



### Stage 5: Collating, summarizing and reporting the results

In order to create a useful summary of the data, we will combine all expectations and competency related statements retrieved from all sources.

The general and specific descriptions of expectations and competencies of peer reviewers extracted from the different sources will be combined and de-duplicated, producing a list of unique statements. These will subsequently be organized into emerging categories.

A checklist for reporting scoping reviews - the “Preferred Reporting Items for Systematic Reviews and Meta-Analysis: extension for Scoping Reviews (PRISMA-ScR)” is currently under development (35). If published by the time the scoping review is complete, the PRISMA-ScR will be used.

### Stage 6: Consultation

This final stage refers to consultation with stakeholders in the field of peer review to inform and validate findings from the scoping review. This has also been shown to be a knowledge translation activity and an important step in scoping reviews (36).

The consultation will take place with journal editors, as well as peer reviewers themselves, to explore their views and perspectives on the roles and tasks of peer reviewers. Outcomes will be presented in detail in separate research papers.

### Conclusion

To our knowledge, this scoping review is the first attempt to systematically identify the roles and tasks of peer reviewers involved in the manuscript review process in biomedical journals.

As a standalone research piece it will primarily be helpful to determine and highlight the different perspectives around the roles and tasks of peer reviewers, and will be relevant to a variety of audiences including editors, peer reviewers, and authors. It will also inform the consequent consultation with stakeholders, with the aim of developing a taxonomy of peer reviewers’ roles and tasks leading to the development of a set of core competencies for peer reviewers of biomedical journals. The study findings could further be used by journal editors to review their instructions to peer reviewers and develop/update training courses for peer reviewers.

**Ethical approval** This manuscript outlines a protocol for a scoping review that will undertake secondary data analysis and hence does not require ethical approval. Ethical approval for the consultation stage will be sought separately.

**Acknowledgements** The authors would like to thank Daniel R. Shanahan, Dr. Dario Sambunjak and David Blanco de Tena-Dávila for providing advice during the writing of this protocol, and Ana Utrobičić for expertise provided in designing the search strategy for this scoping review.

**Contributors** All authors have made substantive intellectual contributions to the development of this protocol. KG, DH, EC, IB and DM jointly conceived the idea for the project. DC, EC, IB, DM and DH contributed to the study design and development of research questions. KG conceptualized the review approach and led the writing of the manuscript. DH led the supervision of the manuscript preparation. All authors provided detailed comments on earlier drafts, and approved this manuscript.

1  
2  
3 **Funding** This project was supported by the European Union's Horizon 2020 research and innovation  
4 programme under the Marie Skłodowska-Curie grant agreement No 676207. The funders had no role in the  
5 study design, data collection and analysis, decision to publish, or preparation of the manuscripts.  
6  
7

8 **Competing interests** None.  
9  
10  
11  
12  
13  
14  
15  
16  
17  
18  
19  
20  
21  
22  
23  
24  
25  
26  
27  
28  
29  
30  
31  
32  
33  
34  
35  
36  
37  
38  
39  
40  
41  
42  
43  
44  
45  
46  
47  
48  
49  
50  
51  
52  
53  
54  
55  
56  
57  
58  
59  
60

For peer review only

## References

1. Kronick DA. Peer review in 18th-century scientific journalism. *JAMA* [Internet]. 1990;263. Available from: <http://dx.doi.org/10.1001/jama.1990.03440100021002>
2. Harley D. Scholarly communication: cultural contexts, evolving models. *Science*. 2013 Oct 4;342(6154):80–2.
3. Jefferson T, Wager E, Davidoff F. Measuring the quality of editorial peer review. *JAMA* [Internet]. 2002;287. Available from: <http://dx.doi.org/10.1001/jama.287.21.2786>
4. Moher D, Glasziou P, Chalmers I, Nasser M, Bossuyt PM, Korevaar DA, et al. Increasing value and reducing waste in biomedical research: who's listening? *The Lancet*. 2016;387(10027):1573–86.
5. Kassirer JP, Champion EW. Peer review: crude and understudied, but indispensable. *Jama*. 1994;272(2):96–7.
6. Scarfe WC. Translation of the Scientific Method... Peer Review. *Oral Surg Oral Med Oral Pathol Oral Radiol Endodontology*. 2010;109(4):485–7.
7. Orleans L, Manchikanti L. Medical journal peer review: process and bias. *Pain Physician*. 2015;18:E1–14.
8. Kravitz RL, Franks P, Feldman MD. Editorial peer reviewers' recommendations at a general medical journal: are they reliable and do editors care? *PLoS One* [Internet]. 2010;5. Available from: <http://dx.doi.org/10.1371/journal.pone.0010072>
9. Galipeau J, Barbour V, Baskin P, Bell-Syer S, Cobey K, Cumpston M, et al. A scoping review of competencies for scientific editors of biomedical journals. *BMC Med*. 2016;14:16.
10. Moher D, Altman DG. Four Proposals to Help Improve the Medical Research Literature. *PLOS Med*. 2015 Sep 22;12(9):e1001864.
11. Mulligan A, Hall L, Raphael E. Peer review in a changing world: An international study measuring the attitudes of researchers. *J Am Soc Inf Sci Technol*. 2013;64(1):132–61.
12. Smith R. Peer review: a flawed process at the heart of science and journals. *J R Soc Med*. 2006 Apr;99(4):178–82.
13. Tite L, Schroter S. Why do peer reviewers decline to review? A survey. *J Epidemiol Community Health*. 2007;61(1):9–12.
14. Shattell MM, Chinn P, Thomas SP, Cowling WR. Authors' and editors' perspectives on peer review quality in three scholarly nursing journals. *J Nurs Scholarsh Off Publ Sigma Theta Tau Int Honor Soc Nurs*. 2010 Mar;42(1):58–65.
15. Godlee F, Jefferson T. Peer review in health sciences. *BMJ Books London*; 2003.

16. Wager E, Jefferson T. Shortcomings of peer review in biomedical journals. *Learn Publ.* 2001 Oct 1;14(4):257–63.
17. Lee CJ, Sugimoto CR, Zhang G, Cronin B. Bias in peer review. *J Am Soc Inf Sci Technol.* 2013 Jan 1;64(1):2–17.
18. Bruce R, Chauvin A, Trinquart L, Ravaud P, Boutron I. Impact of interventions to improve the quality of peer review of biomedical journals: a systematic review and meta-analysis. *BMC Med.* 2016;14(1):85.
19. Schroter S, Black N, Evans S. Effects of training on quality of peer review: randomised controlled trial. *BMJ [Internet].* 2004;328. Available from: <http://dx.doi.org/10.1136/bmj.38023.700775.AE>
20. PubPeer - What errors do peer reviewers detect, and does training improve their ability to detect them? [Internet]. [cited 2016 Nov 20]. Available from: <https://pubpeer.com/publications/54CDC9161958EBE471CC7A633C236B>
21. Chauvin A, Ravaud P, Baron G. The most important tasks for peer reviewers evaluating a randomized controlled trial are not congruent with the tasks most often requested by journal editors. *BMC Med [Internet].* 2015;13. Available from: <http://dx.doi.org/10.1186/s12916-015-0395-3>
22. Arksey H, O'Malley L. Scoping studies: towards a methodological framework. *Int J Soc Res Methodol.* 2005;8(1):19–32.
23. Armstrong R, Hall BJ, Doyle J, Waters E. “Scoping the scope” of a cochrane review [Internet]. [cited 2016 Dec 7]. Available from: <http://jpubhealth.oxfordjournals.org>
24. Moher D, Stewart L, Shekelle P. All in the Family: systematic reviews, rapid reviews, scoping reviews, realist reviews, and more. *Syst Rev.* 2015;4:183.
25. Levac D, Colquhoun H, O'Brien KK. Scoping studies: advancing the methodology. *Implement Sci IS.* 2010 Sep 20;5:69.
26. Joanna Briggs Institute. The Joanna Briggs Institute Reviewers' Manual 2015. *Methodol JBI Scoping Rev Joanna Briggs Inst JBI.* 2015;
27. Richardson WS, Wilson MC, Nishikawa J, Hayward RS. The well-built clinical question: a key to evidence-based decisions. *ACP J Club.* 1995 Dec;123(3):A12-13.
28. Larson BP, Chung KC. A systematic review of peer review for scientific manuscripts. *Hand N Y N.* 2012 Mar;7(1):37–44.
29. McGowan J, Sampson M, Salzwedel DM, Cogo E, Foerster V, Lefebvre C. PRESS Peer Review of Electronic Search Strategies: 2015 Guideline Statement. *J Clin Epidemiol.* 2016 Jul;75:40–6.

- 1  
2  
3 30. Altman DG. Endorsement of the CONSORT statement by high impact medical journals:  
4 survey of instructions for authors. *BMJ*. 2005 May 7;330(7499):1056–7.  
5  
6  
7 31. Shamseer L, Hopewell S, Altman DG, Moher D, Schulz KF. Update on the endorsement of  
8 CONSORT by high impact factor journals: a survey of journal “Instructions to Authors” in  
9 2014. *Trials*. 2016;17:301.  
10  
11 32. Free Online Course on Journal Peer Review | Cochrane Eyes and Vision [Internet]. [cited 2017  
12 Feb 7]. Available from: /free-online-course-journal-peer-review  
13  
14 33. Home [Internet]. Publons. [cited 2017 Apr 3]. Available from: <http://home.publons.com/>  
15  
16  
17 34. Research Digest | METRICS [Internet]. [cited 2017 Feb 21]. Available from:  
18 <http://metrics.stanford.edu/resources/research-digest>  
19  
20 35. Reporting guidelines under development | The EQUATOR Network [Internet]. [cited 2016  
21 Dec 21]. Available from: [http://www.equator-network.org/library/reporting-guidelines-under-](http://www.equator-network.org/library/reporting-guidelines-under-development/)  
22 [development/](http://www.equator-network.org/library/reporting-guidelines-under-development/)  
23  
24  
25 36. Tricco AC, Lillie E, Zarin W, O’Brien K, Colquhoun H, Kastner M, et al. A scoping review on  
26 the conduct and reporting of scoping reviews. *BMC Med Res Methodol* [Internet]. 2016 Feb 9  
27 [cited 2016 Dec 17];16. Available from:  
28 <http://www.ncbi.nlm.nih.gov/pmc/articles/PMC4746911/>  
29  
30  
31  
32  
33  
34  
35  
36  
37  
38  
39  
40  
41  
42  
43  
44  
45  
46  
47  
48  
49  
50  
51  
52  
53  
54  
55  
56  
57  
58  
59  
60

## Additional file 1

## Scoping review on the roles and tasks of peer reviewers in the biomedical journal editorial process

Databases: Ovid MEDLINE(R) Epub Ahead of Print, In-Process & Other Non-Indexed Citations, Ovid MEDLINE(R) Daily and Ovid MEDLINE(R) 1946 to Present (April 2017 Week 2)

|   |                                                                                                                                                                                                                                                                                                                                                                                                                                           |
|---|-------------------------------------------------------------------------------------------------------------------------------------------------------------------------------------------------------------------------------------------------------------------------------------------------------------------------------------------------------------------------------------------------------------------------------------------|
| 1 | ((reviewing or reviewer or peer reviewer or peer-revie* or peer review) adj5 (abilit* or aptitud* or capabilit* or capacit* or character* or competen* or criteri* or educat* or effectiv* or evaluat* or expertise or integrit* or knowledg* or learning or proficien* or qualifi* or qualify or recommend* or responsibilit* or role or roles or skill or skills or standard or standards or talent* or task or tasks or training)).tw. |
| 2 | exp *peer review, research/                                                                                                                                                                                                                                                                                                                                                                                                               |
| 3 | professional competence/                                                                                                                                                                                                                                                                                                                                                                                                                  |
| 4 | responsibility/                                                                                                                                                                                                                                                                                                                                                                                                                           |
| 5 | 3 or 4                                                                                                                                                                                                                                                                                                                                                                                                                                    |
| 6 | 2 and 5                                                                                                                                                                                                                                                                                                                                                                                                                                   |
| 7 | 1 or 6                                                                                                                                                                                                                                                                                                                                                                                                                                    |

4821 [MEDLINE UNIQUE HITS]

review only

# BMJ Open

## A scoping review protocol on the roles and tasks of peer reviewers in the manuscript review process in biomedical journals

|                                 |                                                                                                                                                                                                                                                                                                                                                                                                                                                                                                                                                                                                                                                                                                                                                                                                             |
|---------------------------------|-------------------------------------------------------------------------------------------------------------------------------------------------------------------------------------------------------------------------------------------------------------------------------------------------------------------------------------------------------------------------------------------------------------------------------------------------------------------------------------------------------------------------------------------------------------------------------------------------------------------------------------------------------------------------------------------------------------------------------------------------------------------------------------------------------------|
| Journal:                        | <i>BMJ Open</i>                                                                                                                                                                                                                                                                                                                                                                                                                                                                                                                                                                                                                                                                                                                                                                                             |
| Manuscript ID                   | bmjopen-2017-017468.R1                                                                                                                                                                                                                                                                                                                                                                                                                                                                                                                                                                                                                                                                                                                                                                                      |
| Article Type:                   | Protocol                                                                                                                                                                                                                                                                                                                                                                                                                                                                                                                                                                                                                                                                                                                                                                                                    |
| Date Submitted by the Author:   | 05-Jul-2017                                                                                                                                                                                                                                                                                                                                                                                                                                                                                                                                                                                                                                                                                                                                                                                                 |
| Complete List of Authors:       | <p>Glonti, Ketevan; University of Split, Chair of Psychology, Faculty of Humanities and Social Sciences; Universite Paris Descartes, Centre of Research in Epidemiology and Statistics Sorbonne Paris Cité - CRESS UMR1153</p> <p>Cauchi, Daniel ; Ministry of Health Malta</p> <p>Cobo, Erik; Universitat Politecnica Catalunya, Statistics and Operational Research</p> <p>Boutron, Isabelle; Université Paris Descartes, Centre d'épidémiologie clinique; Universite Paris Descartes, Centre of Research in Epidemiology and Statistics Sorbonne Paris Cité - CRESS UMR1153</p> <p>Moher, David; Ottawa Hospital Research Institute, Centre for Journalology, Clinical Epidemiology Program,</p> <p>Hren, Darko; University of Split, Chair of Psychology, Faculty of Humanities and Social Sciences</p> |
| <b>Primary Subject Heading</b>: | Medical publishing and peer review                                                                                                                                                                                                                                                                                                                                                                                                                                                                                                                                                                                                                                                                                                                                                                          |
| Secondary Subject Heading:      | Medical publishing and peer review, Research methods                                                                                                                                                                                                                                                                                                                                                                                                                                                                                                                                                                                                                                                                                                                                                        |
| Keywords:                       | Peer review, Scoping review, Competencies, Role, Tasks, Biomedical Publishing                                                                                                                                                                                                                                                                                                                                                                                                                                                                                                                                                                                                                                                                                                                               |
|                                 |                                                                                                                                                                                                                                                                                                                                                                                                                                                                                                                                                                                                                                                                                                                                                                                                             |

SCHOLARONE™  
Manuscripts

# A scoping review protocol on the roles and tasks of peer reviewers in the manuscript review process in biomedical journals

**Authors:** Ketevan Glonti<sup>1,2</sup>, Daniel Cauchi<sup>3</sup>, Erik Cobo<sup>4</sup>, Isabelle Boutron<sup>2,5</sup>, David Moher<sup>6</sup>, Darko Hren<sup>1</sup>

<sup>1</sup> Chair of Psychology, Faculty of Humanities and Social Sciences, University of Split, Split, Croatia. [kglonti@unist.hr](mailto:kglonti@unist.hr), [dhren@ffst.hr](mailto:dhren@ffst.hr)

<sup>2</sup> Centre of Research in Epidemiology and Statistics Sorbonne Paris Cité - CRESS UMR1153, Paris, France

<sup>3</sup> Ministry of Health, Malta, [dcauchi@gmail.com](mailto:dcauchi@gmail.com)

<sup>4</sup> Statistics and Operations Research Department, Barcelona-Tech, UPC, c/ Jordi Girona 1, C5-213, 08034, Barcelona, Spain. [erik.cobo@upc.edu](mailto:erik.cobo@upc.edu)

<sup>5</sup> Université Paris Descartes, Centre d'épidémiologie Clinique, Hôpital Hôtel-Dieu, 1 place du Parvis Notre-Dame, Paris, 75004, France. [isabelle.boutron@aphp.fr](mailto:isabelle.boutron@aphp.fr)

<sup>6</sup> Center for Journalology, Clinical Epidemiology Program, Ottawa Hospital Research Institute, Ottawa, Canada. [dmoher@ohri.ca](mailto:dmoher@ohri.ca)

**Corresponding author:** Ketevan Glonti, Filozofski fakultet, Put iza nove bolnice 10c, 21000 Split, Croatia  
Email: [kglonti@unist.hr](mailto:kglonti@unist.hr)  
Tel: +385 976324635

## Abstract

**Introduction:** The primary functions of peer reviewers are poorly defined. Thus far no body of literature has systematically identified the roles and tasks of peer reviewers of biomedical journals. A clear establishment of these can lead to improvements in the peer review process. The purpose of this scoping review is to determine what is known on the roles and tasks of peer reviewers.

**Methods:** We will use the methodological framework first proposed by Arksey and O'Malley and subsequently adapted by Levac and the Joanna Briggs Institute. The scoping review will include all study designs as well as editorials, commentaries and grey literature. The following eight electronic databases will be searched (from inception to May 2017): Cochrane Library, Cumulative Index to Nursing and Allied Health Literature; Educational Resources Information Centre; EMBASE; MEDLINE; PsycINFO; Scopus and Web of Science. Two reviewers will use inclusion and exclusion criteria based on the 'Population – Concept – Context' framework to independently screen titles and abstracts of articles considered for inclusion. Full-text screening of relevant eligible articles will also be carried out by two reviewers.

The search strategy for grey literature will include searching in websites of existing networks, biomedical journal publishers, and organizations that offer resources for peer reviewers.

In addition we will review journal guidelines to peer reviewers on how to perform the manuscript review. Journals will be selected using 2016 journal impact factor. We will identify and assess the top five, middle five and lowest-ranking five journals across all medical specialties.



**Ethics and dissemination:** This scoping review will undertake a secondary analysis of data already collected and does not require ethical approval.

The results will be disseminated through journals and conferences targeting stakeholders involved in peer review in biomedical research.

**Keywords:** Peer review, Competencies, Scoping review, Roles, Tasks, Biomedical publishing

### Strengths and limitations of this study

- The scoping review approach will cover a vast volume of literature, thus offering a ‘big picture’ on roles and tasks of peer reviewers in the manuscript peer review process in biomedical journals
- This scoping review is the first step of a broader project. It will be followed by consultation with journal editors and peer reviewers.
- As this is a scoping review, the quality of the evidence and risk of bias will not be evaluated.

### Background

The publication of peer-reviewed articles in scientific journals has long been the cornerstone of science (1), and the primary means by which new research is documented and the outcomes disseminated (2). Manuscripts that are submitted for publication in scientific journals typically undergo a critical appraisal process by researchers from a similar field who are in the wider sense peers and colleagues - known as peer review - as part of a broader editorial process led by journal editors (3). However, the importance of peer reviewing within this process extends beyond purely academic concerns. Academic publishing lies at the interface between biomedical research and practice, having the potential to influence clinical decisions (4,5). Clinical decisions should be guided by the best evidence available, yet these can be misleading if they are based on incomplete or inaccurate information. Any process that influences the accuracy, quality, assessment and dissemination of clinical evidence may therefore have a direct impact on patient care (3). The editorial process within biomedical journals can thus be considered to be a “gatekeeper” for scientific publications, consisting of the following steps:

1. Editors consider the overall ‘fit’ of the research article to the journal, as well as suitability and relevance for the journal and its readership (6)
2. Selection of reviewers by the editors: within the traditional biomedical sphere, peer reviewers are typically invited by journal editors to review manuscripts on the basis of their apparent expertise, which is often gauged in terms of their article output in their respective research area.
3. Editors communicate with both reviewers and authors and coordinate their interaction during peer review.

Editors are responsible for taking an independent decision regarding the fate of the manuscript (i.e. whether it is accepted for publication or not) (7). However, it has been suggested that journal editors are not entirely independent in their assessment of an article’s suitability for publication once it has undergone peer review. Research indicates that editors give considerable weight to reviewers’ recommendations on whether to reject or accept a manuscript (8). This may in part be due to the fact that core competencies for scientific editors in biomedical research have not yet been formally established (9), and most scientific editors of biomedical journals do not receive formal training (10). This is also the case for the majority of reviewers. Despite a significant proportion of reviewers perceiving that they need guidance and formal training on

1  
2  
3 how to conduct a peer review (11), most are not trained in how to write a reviewers' report. Instead,  
4 reviewing is often a skill learnt through feedback received on their own submitted manuscripts (12).  
5 Furthermore, since it is rare for reviewers to receive feedback on their own reviewer reports, it is difficult  
6 for them to know whether their reviews are of good quality (13).  
7  
8

9  
10 Although journals, authors and reviewers widely support peer review as the primary tool for evaluating  
11 research outputs in biomedical research (11,14,15), there is concurrently a broad consensus across scientific  
12 disciplines that the peer review process may be flawed (12,16,17). A growing body of literature has  
13 identified several potential problems including misjudgment by editors, and biased, inconsistent or  
14 inadequate reviewing by reviewers (17).  
15

16 Over the years, there have been various attempts to improve the quality of peer reviewer reports in  
17 biomedical science. A recent systematic review evaluating the impact of interventions aimed at improving  
18 the quality of peer review of Randomized Controlled Trials (RCTs) for biomedical publications concluded  
19 that there is a need to clarify the roles and tasks of peer reviewers as a step forward in quality improvement  
20 of peer reviewing (18). Within the biomedical field, the apparent roles and tasks of peer reviewers are  
21 closely related to the structural properties of the editorial process itself. For example, some - but not all -  
22 journals require peer reviewers to assess novelty and/or clinical relevance of articles in addition to assessing  
23 scientific rigor. Journals also differ with regards to their expectations of how a reviewer report should be  
24 written. Some journals encourage reviewers to follow a specific structure in their reporting, whereas other  
25 journals prefer free text. Journals also differ in their request for peer reviewer recommendations regarding  
26 whether an article should be accepted for publication in the journal or not.  
27

28 These differences may influence quality of peer review reporting, and thus quality of the peer review  
29 process across journals. An RCT aimed at determining the effects of training peer reviewers found only a  
30 slight positive impact on the quality of peer review. After receiving training, the quality of the peer  
31 reviewers' reports as measured by the 'Review Quality Instrument' that assesses the extent to which a  
32 reviewer has commented on five aspects of a manuscript (importance of the research question, originality of  
33 the paper, strengths and weaknesses of the method, presentation, interpretation of results) and on two  
34 aspects of the review (constructiveness and substantiation of comments), was deemed to have improved  
35 overall. However, peer reviewers in the study failed to detect all major errors that were introduced to the  
36 articles under review (19). At the same time, a major criticism of this study was that reviewers do not  
37 necessarily think that their task is to find all major errors in an article (20). This dissonance was also  
38 reflected in a recent study that showed that the most important tasks in peer review, as perceived by peer  
39 reviewers evaluating RCTs, were not congruent with the tasks most often requested by journal editors in  
40 their guidelines to reviewers (21).  
41

42 These differences clearly illustrate the need to clarify the roles and tasks of peer reviewers. Thus far, this  
43 has only been somewhat explored, to a limited extent, for RCTs (21) but not for other study designs.  
44

45 The primary objective of this research is to determine the specific roles and tasks of peer reviewers as  
46 depicted in biomedical research. The wider purpose of this research is to inform and facilitate the future  
47 development of a set of core tasks that should be (asked of peer reviewers) carried out by peer reviewers.  
48 This will contribute to improvements in the quality of peer reviewer reports, and ultimately of the  
49 biomedical scientific literature in general.  
50  
51  
52  
53  
54  
55  
56  
57  
58  
59  
60

## Methods

A scoping review was considered to be the most suitable approach to responding to the broad aim of this study. In contrast to systematic literature reviews that aim to answer specific questions, scoping reviews have been described as a process of producing a broad overview of the field (22–24). This will be achieved through a scoping review of both published biomedical journal articles and grey literature. Grey literature will be searched because it is likely that most of the information being sought (i.e. descriptions of the roles of peer reviewers) would be found in calls for reviewers on journal websites; and guidance documents – all of which would not generally be captured in a traditional review of published research. This approach has been previously adopted by authors of a study that aimed to identify competencies of scientific editors of biomedical journals (9).

This scoping review will use the methodological framework proposed by Arksey and O'Malley (22), as well as the amendments made to this framework by Levac (25) and by the Joanna Briggs Institute (26). The framework consists of six consecutive stages: 1. Identifying the research question 2. Identifying relevant studies, 3. Study selection, 4. Charting the data 5. Collating, summarizing, and reporting results and 6. Consultation. Each stage is discussed in further detail below.

### Stage 1: Identifying the research question

Arksey and O'Malley suggest an iterative process for developing one or more research questions. In the first stage two research questions have been identified based on gaps in the literature:

1. What are the expected roles of peer reviewers in the editorial peer review process in biomedical journals?
2. What are the range of tasks that peer reviewers are expected to perform for biomedical journals?

Given that some overlap between the terms “roles” and “tasks” is expected, we defined “roles” as referring to the overarching nature of peer reviewers’ function, whereas “tasks” refer more specifically to actions that fulfil these roles.

These questions might be refined, or new ones added, as the authors gain increasing familiarity with the literature.

### Stage 2: Identifying relevant studies

A comprehensive search strategy will be developed in order to identify relevant literature, underpinned by key inclusion criteria (see Box 1). These are based on ‘Population – Concept – Context (PCC)’ framework recommended by the Joanna Briggs Institute for scoping reviews (26), which has roots in the PICO (Population, Intervention, Comparator and Outcome) framework commonly used to focus clinical questions and develop systematic literature search strategies (27).

#### Box 1 Inclusion criteria

- |                |                                                                                                                                                                                                            |
|----------------|------------------------------------------------------------------------------------------------------------------------------------------------------------------------------------------------------------|
| P – Population | = Journal editors, publishers, peer reviewers, (corresponding) authors in biomedical journals, and organizations that offer (educational) resources and training to peer reviewers in the biomedical field |
| C – Concept    | = Articles with specific focus and/or statements mentioning roles, tasks, competencies pertaining to the role of peer reviewers in the journal editorial process.                                          |
| C – Context    | = The review will include all study designs as well as book chapters, editorials and commentaries from the biomedical field. There will be no date and language restrictions.                              |

### Exclusion criteria

Studies referring to peer review that is not related to manuscript peer reviewing in biomedical journals (e.g. grant peer review, professional performance review, peer review of teaching etc.) were excluded.

### Search strategy

The electronic literature search strategy will follow the three-step process recommended by the Joanna Briggs Institute (26). The first step consisted of an initial preliminary search of at least two online databases relevant to the topic. This was undertaken for MEDLINE (via Ovid) using the “peer review, research” Medical Subject Headings (MeSH) and ‘peer review’ key word in the Cochrane Library resulting in 2,017 studies in CDSR and 13,717 in MEDLINE. In the second step, we will closely review potentially relevant text words in the titles and abstracts of the most pertinent papers in order to compile a list of terms that can be used to inform our search strategy. Index terms used to describe the articles will also be included. This list will be combined with search strategies from existing scoping and systematic reviews on peer review (9,21,28) to develop database-specific search strategies.

The Peer Review of Electronic Search Strategies (PRESS) 2015 Guideline statement will be used to guide the electronic literature search strategies (29). These will be further refined in collaboration with a Health Sciences Librarian. Subsequently, the following databases will be searched: Cochrane Library, Cumulative Index to Nursing and Allied Health Literature (CINAHL); Educational Resources Information Centre (ERIC); EMBASE (via Ovid); PsycINFO (via Ovid); MEDLINE (via Ovid), Scopus and Web of Science. The search strategy for MEDLINE can be found in the online supplementary (Appendix 1).

There will be no time or language restrictions. The authors involved in this protocol are in command of the following languages: Catalan, Croatian, English, French, German, Italian, Russian, and Spanish. Relevant articles identified in any other language will be translated.

In the third and last step the reference lists of included studies as well as websites of journals such as JAMA,

Nature and Science which display a strong interest in peer review as evidenced by numerous publications on the topic will be hand searched using key words related to peer review, as outlined in the MEDLINE strategy (i.e. ‘peer review’) to identify any additional literature that was not detected by the search strategy.

The search strategy for grey literature will include searching in websites of existing networks (i.e. EQUATOR Network, New Frontiers of Peer Review (PEERE)), biomedical journal publishers (i.e. BMJ Publishing Group, Elsevier, Springer Nature, Taylor & Frances, Wiley), and organizations that offer resources for reviewers (including educational courses, for example those provided by Cochrane (30)) and Publons (31)) Relevant blogs, newsletters (i.e. The METRICS Research Digest (32)), surveys and reports of authors/reviewer workshops will also be considered.

In addition we will review journal guidelines to peer reviewers on how to perform the manuscript review.

The guidelines will be searched for statements around the roles and tasks of peer reviewers.

Journals will be selected using 2016 journal impact factor (Thomson Reuters Journal Citation Reports-Science Citation Index Expanded). We will identify and assess the top five, middle five and lowest-ranking five journals across the medical specialties recognized in the Directive 2005/36/EC of the European Parliament and of the Council of 7 September 2005 (on the recognition of professional qualifications).

It is expected that some journals may directly communicate their instructions to peer reviewers via email or through their submission systems, rather than through publicly available instructions. In order to obtain the content of such instructions for examination we will contact the editor-in-chief and/or managing editor of the identified journals to request details of any 'direct to reviewer' guidance.

### Stage 3: Study selection

Following the execution of the search strategy, the identified records (titles and abstracts) will be collated in a reference manager for de-duplication. The final unique set of records will be imported into a systematic review paper manager that facilitates independent screening and logs disagreements between reviewers.

The study selection process will be implemented over two stages. The first stage will involve the screening of titles and abstracts by two reviewers (K.G. and D.C.) to determine each article's eligibility for full text screening based on *a-priori* inclusion criteria. The second stage of the selection process will consist of retrieving the full text of all potentially eligible articles, which will also be independently screened. Disagreements between reviewers regarding eligibility will be resolved by a third member of the research team (D.H.). Data will also be extracted independently by K.G. and D.C.

We expect that some of the grey literature might subsequently be published elsewhere in the indexed literature. This will be accounted for by cross-checking authors' names across grey literature and index literature results in order to identify potential duplicates.

An adapted version of the PRISMA flow diagram will be used to report final numbers in the resulting study publication once the review is completed. Reasons for exclusion will be recorded at the full-text review stage.

### Stage 4: Charting the data

A draft charting form (see Table 1) has been developed at the protocol stage to aid the collection and sorting of key pieces of information from the selected articles. It will be pilot-tested and refined during the full-text screening to capture detailed information on each study. The information from research based and non-research based publications will be collected in separate extraction forms. Additional categories that may emerge during data extraction will be added accordingly.

Another form will be developed for the extraction of information from the journal guidelines to peer reviewers. In addition to the general and specific descriptions of expectations and competencies of peer reviewers, variations according to journals and their peer review models (such as: single-blind peer review, double-blind peer review, open peer review, post-publication peer review) and whether peer reviewers have to provide specific recommendations (i.e. no revision, minor revision, major revision, reject) will be noted.

Table 1 Draft data charting form

| Study characteristics     | Extracted data                                                                                                                                                       |
|---------------------------|----------------------------------------------------------------------------------------------------------------------------------------------------------------------|
| General information       | First author' last name<br>Journal<br>Publication year<br>Study design<br>Publication type: journal article, editorial, conference abstract, grey literature, report |
| Definition of peer review | Underlying definition and conceptualization of                                                                                                                       |

|                                                                                      |                                                                |
|--------------------------------------------------------------------------------------|----------------------------------------------------------------|
|                                                                                      | the peer review process                                        |
| General and specific descriptions of expectations and competencies of peer reviewers | Abilities<br>Knowledge<br>Roles<br>Tasks<br>Training<br>Skills |

### Stage 5: Collating, summarizing and reporting the results

In order to create a useful summary of the data, we will combine all expectations and competency-related statements retrieved from all sources.

The general and specific descriptions of expectations and competencies of peer reviewers extracted from the different sources will be combined and de-duplicated, producing a list of unique statements. These will subsequently be organized into emerging categories. While the primary goal is to extract roles and tasks of peer reviewers, additional items related to particular abilities, knowledge, training and skills will also be extracted.

A checklist for reporting scoping reviews - the “Preferred Reporting Items for Systematic Reviews and Meta-Analysis: extension for Scoping Reviews (PRISMA-ScR)” is currently under development (33). If published by the time the scoping review is complete, the PRISMA-ScR will be used.

### Stage 6: Consultation

This final stage refers to consultation with stakeholders in the field of peer review to inform and validate findings from the scoping review. This has also been shown to be a knowledge translation activity and an important step in scoping reviews (34).

The consultation will take place with journal editors, as well as peer reviewers themselves, to explore their views and perspectives on the roles and tasks of peer reviewers. Results will be presented in detail in separate research papers.

### Conclusion

To the best of our knowledge this scoping review is the first attempt to systematically identify the roles (overarching nature of the work) and tasks (specific actions carried out to fulfil these roles) of peer reviewers involved in the manuscript review process in biomedical journals.

As a standalone research piece it will primarily be helpful to determine and highlight the different perspectives around the roles and tasks of peer reviewers, and will be relevant to a variety of audiences including editors, peer reviewers, and authors. It will also inform the consequent consultation with stakeholders, with the aim of developing a taxonomy of peer reviewers’ roles and tasks leading to the development of a set of core competencies for peer reviewers of biomedical journals. The study findings could further be used by journal editors to review their instructions to peer reviewers and develop/update training courses for peer reviewers.

**Ethical approval** This manuscript outlines a protocol for a scoping review that will undertake secondary data analysis and hence does not require ethical approval.

Ethical approval for the consultation stage will be sought separately.

1  
2  
3 **Acknowledgements** The authors would like to thank Dr. Dario Sambunjak and David Blanco de Tena-  
4 Dávila for providing advice during the writing of this protocol. .  
5  
6

7 **Contributors** All authors have made substantive intellectual contributions to the development of this  
8 protocol. KG, DH, EC, IB and DM jointly conceived the idea for the project. DC, EC, IB, DM and DH  
9 contributed to the study design and development of research questions. KG conceptualized the review  
10 approach and led the writing of the manuscript. DH led the supervision of the manuscript preparation.  
11 All authors provided detailed comments on earlier drafts, and approved this manuscript.  
12  
13

14 **Funding** This project was supported by the European Union's Horizon 2020 research and innovation  
15 programme under the Marie Skłodowska-Curie grant agreement No 676207. The funders had no role in the  
16 study design, data collection and analysis, decision to publish, or preparation of the manuscripts.  
17  
18

19 **Competing interests** None.  
20  
21  
22  
23  
24  
25  
26  
27  
28  
29  
30  
31  
32  
33  
34  
35  
36  
37  
38  
39  
40  
41  
42  
43  
44  
45  
46  
47  
48  
49  
50  
51  
52  
53  
54  
55  
56  
57  
58  
59  
60

## References

1. Kronick DA. Peer review in 18th-century scientific journalism. *JAMA* [Internet]. 1990;263. Available from: <http://dx.doi.org/10.1001/jama.1990.03440100021002>
2. Harley D. Scholarly communication: cultural contexts, evolving models. *Science*. 2013 Oct 4;342(6154):80–2.
3. Jefferson T, Wager E, Davidoff F. Measuring the quality of editorial peer review. *JAMA* [Internet]. 2002;287. Available from: <http://dx.doi.org/10.1001/jama.287.21.2786>
4. Moher D, Glasziou P, Chalmers I, Nasser M, Bossuyt PM, Korevaar DA, et al. Increasing value and reducing waste in biomedical research: who's listening? *The Lancet*. 2016;387(10027):1573–86.
5. Kassirer JP, Champion EW. Peer review: crude and understudied, but indispensable. *Jama*. 1994;272(2):96–7.
6. Scarfe WC. Translation of the Scientific Method... Peer Review. *Oral Surg Oral Med Oral Pathol Oral Radiol Endodontology*. 2010;109(4):485–7.
7. Orleans L, Manchikanti L. Medical journal peer review: process and bias. *Pain Physician*. 2015;18:E1–14.
8. Kravitz RL, Franks P, Feldman MD. Editorial peer reviewers' recommendations at a general medical journal: are they reliable and do editors care? *PLoS One* [Internet]. 2010;5. Available from: <http://dx.doi.org/10.1371/journal.pone.0010072>
9. Galipeau J, Barbour V, Baskin P, Bell-Syer S, Cobey K, Cumpston M, et al. A scoping review of competencies for scientific editors of biomedical journals. *BMC Med*. 2016;14:16.
10. Moher D, Altman DG. Four Proposals to Help Improve the Medical Research Literature. *PLOS Med*. 2015 Sep 22;12(9):e1001864.
11. Mulligan A, Hall L, Raphael E. Peer review in a changing world: An international study measuring the attitudes of researchers. *J Am Soc Inf Sci Technol*. 2013;64(1):132–61.
12. Smith R. Peer review: a flawed process at the heart of science and journals. *J R Soc Med*. 2006 Apr;99(4):178–82.
13. Tite L, Schroter S. Why do peer reviewers decline to review? A survey. *J Epidemiol Community Health*. 2007;61(1):9–12.
14. Shattell MM, Chinn P, Thomas SP, Cowling WR. Authors' and editors' perspectives on peer review quality in three scholarly nursing journals. *J Nurs Scholarsh Off Publ Sigma Theta Tau Int Honor Soc Nurs*. 2010 Mar;42(1):58–65.
15. Godlee F, Jefferson T. Peer review in health sciences. *BMJ Books London*; 2003.



16. Wager E, Jefferson T. Shortcomings of peer review in biomedical journals. *Learn Publ.* 2001 Oct 1;14(4):257–63.
17. Lee CJ, Sugimoto CR, Zhang G, Cronin B. Bias in peer review. *J Am Soc Inf Sci Technol.* 2013 Jan 1;64(1):2–17.
18. Bruce R, Chauvin A, Trinquart L, Ravaud P, Boutron I. Impact of interventions to improve the quality of peer review of biomedical journals: a systematic review and meta-analysis. *BMC Med.* 2016;14(1):85.
19. Schroter S, Black N, Evans S. Effects of training on quality of peer review: randomised controlled trial. *BMJ [Internet].* 2004;328. Available from: <http://dx.doi.org/10.1136/bmj.38023.700775.AE>
20. PubPeer - What errors do peer reviewers detect, and does training improve their ability to detect them? [Internet]. [cited 2016 Nov 20]. Available from: <https://pubpeer.com/publications/54CDC9161958EBE471CC7A633C236B>
21. Chauvin A, Ravaud P, Baron G. The most important tasks for peer reviewers evaluating a randomized controlled trial are not congruent with the tasks most often requested by journal editors. *BMC Med [Internet].* 2015;13. Available from: <http://dx.doi.org/10.1186/s12916-015-0395-3>
22. Arksey H, O'Malley L. Scoping studies: towards a methodological framework. *Int J Soc Res Methodol.* 2005;8(1):19–32.
23. Armstrong R, Hall BJ, Doyle J, Waters E. “Scoping the scope” of a cochrane review [Internet]. [cited 2016 Dec 7]. Available from: <http://jpubhealth.oxfordjournals.org>
24. Moher D, Stewart L, Shekelle P. All in the Family: systematic reviews, rapid reviews, scoping reviews, realist reviews, and more. *Syst Rev.* 2015;4:183.
25. Levac D, Colquhoun H, O'Brien KK. Scoping studies: advancing the methodology. *Implement Sci IS.* 2010 Sep 20;5:69.
26. Joanna Briggs Institute. The Joanna Briggs Institute Reviewers' Manual 2015. *Methodol JBI Scoping Rev Joanna Briggs Inst JBI.* 2015;
27. Richardson WS, Wilson MC, Nishikawa J, Hayward RS. The well-built clinical question: a key to evidence-based decisions. *ACP J Club.* 1995 Dec;123(3):A12-13.
28. Larson BP, Chung KC. A systematic review of peer review for scientific manuscripts. *Hand N Y N.* 2012 Mar;7(1):37–44.
29. McGowan J, Sampson M, Salzwedel DM, Cogo E, Foerster V, Lefebvre C. PRESS Peer Review of Electronic Search Strategies: 2015 Guideline Statement. *J Clin Epidemiol.* 2016 Jul;75:40–6.

- 1  
2  
3 30. Free Online Course on Journal Peer Review | Cochrane Eyes and Vision [Internet]. [cited 2017  
4 Feb 7]. Available from: /free-online-course-journal-peer-review  
5  
6  
7 31. Home [Internet]. Publons. [cited 2017 Apr 3]. Available from: <http://home.publons.com/>  
8  
9 32. Research Digest | METRICS [Internet]. [cited 2017 Feb 21]. Available from:  
10 <http://metrics.stanford.edu/resources/research-digest>  
11  
12 33. Reporting guidelines under development | The EQUATOR Network [Internet]. [cited 2016  
13 Dec 21]. Available from: [http://www.equator-network.org/library/reporting-guidelines-under-](http://www.equator-network.org/library/reporting-guidelines-under-development/)  
14 [development/](http://www.equator-network.org/library/reporting-guidelines-under-development/)  
15  
16  
17 34. Tricco AC, Lillie E, Zarin W, O'Brien K, Colquhoun H, Kastner M, et al. A scoping review on  
18 the conduct and reporting of scoping reviews. BMC Med Res Methodol [Internet]. 2016 Feb 9  
19 [cited 2016 Dec 17];16. Available from:  
20 <http://www.ncbi.nlm.nih.gov/pmc/articles/PMC4746911/>  
21  
22  
23  
24  
25  
26  
27  
28  
29  
30  
31  
32  
33  
34  
35  
36  
37  
38  
39  
40  
41  
42  
43  
44  
45  
46  
47  
48  
49  
50  
51  
52  
53  
54  
55  
56  
57  
58  
59  
60

## Additional file 1

## Scoping review on the roles and tasks of peer reviewers in the biomedical journal editorial process

Databases: Ovid MEDLINE(R) Epub Ahead of Print, In-Process & Other Non-Indexed Citations, Ovid MEDLINE(R) Daily and Ovid MEDLINE(R) 1946 to Present (April 2017 Week 2)

|   |                                                                                                                                                                                                                                                                                                                                                                                                                                           |
|---|-------------------------------------------------------------------------------------------------------------------------------------------------------------------------------------------------------------------------------------------------------------------------------------------------------------------------------------------------------------------------------------------------------------------------------------------|
| 1 | ((reviewing or reviewer or peer reviewer or peer-revie* or peer review) adj5 (abilit* or aptitud* or capabilit* or capacit* or character* or competen* or criteri* or educat* or effectiv* or evaluat* or expertise or integrit* or knowledg* or learning or proficien* or qualifi* or qualify or recommend* or responsibilit* or role or roles or skill or skills or standard or standards or talent* or task or tasks or training)).tw. |
| 2 | exp *peer review, research/                                                                                                                                                                                                                                                                                                                                                                                                               |
| 3 | professional competence/                                                                                                                                                                                                                                                                                                                                                                                                                  |
| 4 | responsibility/                                                                                                                                                                                                                                                                                                                                                                                                                           |
| 5 | 3 or 4                                                                                                                                                                                                                                                                                                                                                                                                                                    |
| 6 | 2 and 5                                                                                                                                                                                                                                                                                                                                                                                                                                   |
| 7 | 1 or 6                                                                                                                                                                                                                                                                                                                                                                                                                                    |

**4821** [MEDLINE UNIQUE HITS]

review only

# BMJ Open

## A scoping review protocol on the roles and tasks of peer reviewers in the manuscript review process in biomedical journals

|                                 |                                                                                                                                                                                                                                                                                                                                                                                                                                                                                                                                                                                                                                                                                                                   |
|---------------------------------|-------------------------------------------------------------------------------------------------------------------------------------------------------------------------------------------------------------------------------------------------------------------------------------------------------------------------------------------------------------------------------------------------------------------------------------------------------------------------------------------------------------------------------------------------------------------------------------------------------------------------------------------------------------------------------------------------------------------|
| Journal:                        | <i>BMJ Open</i>                                                                                                                                                                                                                                                                                                                                                                                                                                                                                                                                                                                                                                                                                                   |
| Manuscript ID                   | bmjopen-2017-017468.R2                                                                                                                                                                                                                                                                                                                                                                                                                                                                                                                                                                                                                                                                                            |
| Article Type:                   | Protocol                                                                                                                                                                                                                                                                                                                                                                                                                                                                                                                                                                                                                                                                                                          |
| Date Submitted by the Author:   | 09-Aug-2017                                                                                                                                                                                                                                                                                                                                                                                                                                                                                                                                                                                                                                                                                                       |
| Complete List of Authors:       | Glonti, Ketevan; University of Split, Chair of Psychology, Faculty of Humanities and Social Sciences; INSERM, METHODS Team, Epidemiology and Biostatistics Sorbonne Paris Cité Research Centre, UMR 1153<br>Cauchi, Daniel ; Ministry of Health Malta<br>Cobo, Erik; Universitat Politècnica Catalunya, Statistics and Operational Research<br>Boutron, Isabelle; INSERM, METHODS Team, Epidemiology and Biostatistics Sorbonne Paris Cité Research Centre, UMR 1153; Université Paris Descartes<br>Moher, David; Ottawa Hospital Research Institute, Centre for Journalology, Clinical Epidemiology Program,<br>Hren, Darko; University of Split, Chair of Psychology, Faculty of Humanities and Social Sciences |
| <b>Primary Subject Heading</b>: | Medical publishing and peer review                                                                                                                                                                                                                                                                                                                                                                                                                                                                                                                                                                                                                                                                                |
| Secondary Subject Heading:      | Medical publishing and peer review, Research methods                                                                                                                                                                                                                                                                                                                                                                                                                                                                                                                                                                                                                                                              |
| Keywords:                       | Peer review, Scoping review, Competencies, Role, Tasks, Biomedical Publishing                                                                                                                                                                                                                                                                                                                                                                                                                                                                                                                                                                                                                                     |
|                                 |                                                                                                                                                                                                                                                                                                                                                                                                                                                                                                                                                                                                                                                                                                                   |

# A scoping review protocol on the roles and tasks of peer reviewers in the manuscript review process in biomedical journals

**Authors:** Ketevan Glonti<sup>1,2,3</sup>, Daniel Cauchi<sup>4</sup>, Erik Cobo<sup>5</sup>, Isabelle Boutron<sup>2,3</sup>, David Moher<sup>6</sup>, Darko Hren<sup>1</sup>

<sup>1</sup> Chair of Psychology, Faculty of Humanities and Social Sciences, University of Split, Split, Croatia. [kglonti@unist.hr](mailto:kglonti@unist.hr), [dhren@ffst.hr](mailto:dhren@ffst.hr)

<sup>2</sup> METHODS Team, Epidemiology and Biostatistics Sorbonne Paris Cité Research Centre, UMR 1153, INSERM.

<sup>3</sup> Paris Descartes University. [isabelle.boutron@aphp.fr](mailto:isabelle.boutron@aphp.fr)

<sup>4</sup> Ministry of Health, Malta, [dcauchi@gmail.com](mailto:dcauchi@gmail.com)

<sup>5</sup> Statistics and Operations Research Department, Barcelona-Tech, UPC, c/ Jordi Girona 1, C5-213, 08034, Barcelona, Spain. [erik.cobo@upc.edu](mailto:erik.cobo@upc.edu)

<sup>6</sup> Center for Journalology, Clinical Epidemiology Program, Ottawa Hospital Research Institute, Ottawa, Canada. [dmoher@ohri.ca](mailto:dmoher@ohri.ca)

**Corresponding author:** Ketevan Glonti, Filozofski fakultet, Put iza nove bolnice 10c, 21000 Split, Croatia  
Email: [kglonti@unist.hr](mailto:kglonti@unist.hr)  
Tel: +385 976324635

## Abstract

**Introduction:** The primary functions of peer reviewers are poorly defined. Thus far no body of literature has systematically identified the roles and tasks of peer reviewers of biomedical journals. A clear establishment of these can lead to improvements in the peer review process. The purpose of this scoping review is to determine what is known on the roles and tasks of peer reviewers.

**Methods:** We will use the methodological framework first proposed by Arksey and O'Malley and subsequently adapted by Levac and the Joanna Briggs Institute. The scoping review will include all study designs as well as editorials, commentaries and grey literature. The following eight electronic databases will be searched (from inception to May 2017): Cochrane Library, Cumulative Index to Nursing and Allied Health Literature; Educational Resources Information Centre; EMBASE; MEDLINE; PsycINFO; Scopus and Web of Science. Two reviewers will use inclusion and exclusion criteria based on the 'Population – Concept – Context' framework to independently screen titles and abstracts of articles considered for inclusion. Full-text screening of relevant eligible articles will also be carried out by two reviewers.

The search strategy for grey literature will include searching in websites of existing networks, biomedical journal publishers, and organizations that offer resources for peer reviewers.

In addition we will review journal guidelines to peer reviewers on how to perform the manuscript review. Journals will be selected using 2016 journal impact factor. We will identify and assess the top five, middle five and lowest-ranking five journals across all medical specialties.

1  
2  
3 45 **Ethics and dissemination:** This scoping review will undertake a secondary analysis of data already  
4 46 collected and does not require ethical approval.  
5  
6 47 The results will be disseminated through journals and conferences targeting stakeholders involved in peer  
7 48 review in biomedical research.  
8 49

9 50 **Keywords:** Peer review, Competencies, Scoping review, Roles, Tasks, Biomedical publishing  
10 51

## 12 52 **Strengths and limitations of this study**

- 13 53 • The strength of this scoping review is that it will cover a vast volume of literature, thus offering a  
14 54 ‘big picture’ on roles and tasks of peer reviewers in the manuscript peer review process in  
15 55 biomedical journals
- 16 56 • Another strength of this study is the inclusion of grey literature including the review of journal  
17 57 guidelines
- 18 58 • As this is a scoping review, the quality of the evidence and risk of bias will not be evaluated.  
19 59

## 22 59 23 60 **Background**

24 61 The publication of peer-reviewed articles in scientific journals has long been the cornerstone of science (1),  
25 62 and the primary means by which new research is documented and the outcomes disseminated (2).  
26 63 Manuscripts that are submitted for publication in scientific journals typically undergo a critical appraisal  
27 64 process by researchers from a similar field who are in the wider sense peers and colleagues - known as peer  
28 65 review - as part of a broader editorial process led by journal editors (3). However, the importance of peer  
29 66 reviewing within this process extends beyond purely academic concerns. Academic publishing lies at the  
30 67 interface between biomedical research and practice, having the potential to influence clinical decisions  
31 68 (4,5). Clinical decisions should be guided by the best evidence available, yet these can be misleading if they  
32 69 are based on incomplete or inaccurate information. Any process that influences the accuracy, quality,  
33 70 assessment and dissemination of clinical evidence may therefore have a direct impact on patient care (3).  
34 71 The editorial process within biomedical journals can thus be considered to be a “gatekeeper” for scientific  
35 72 publications, consisting of the following steps:

- 36 73 1. Editors consider the overall ‘fit’ of the research article to the journal, as well as suitability and  
37 74 relevance for the journal and its readership (6)
- 38 75 2. Selection of reviewers by the editors: within the traditional biomedical sphere, peer reviewers are  
39 76 typically invited by journal editors to review manuscripts on the basis of their apparent expertise,  
40 77 which is often gauged in terms of their article output in their respective research area.
- 41 78 3. Editors communicate with both reviewers and authors and coordinate their interaction during peer  
42 79 review.

43 80 Editors are responsible for taking an independent decision regarding the fate of the manuscript (i.e. whether  
44 81 it is accepted for publication or not) (7). However, it has been suggested that journal editors are not entirely  
45 82 independent in their assessment of an article’s suitability for publication once it has undergone peer review.  
46 83 Research indicates that editors give considerable weight to reviewers' recommendations on whether to  
47 84 reject or accept a manuscript (8). This may in part be due to the fact that core competencies for scientific  
48 85 editors in biomedical research have not yet been formally established (9), and most scientific editors of  
49 86 biomedical journals do not receive formal training (10). This is also the case for the majority of reviewers.

1  
2  
3 87 Despite a significant proportion of reviewers perceiving that they need guidance and formal training on  
4 88 how to conduct a peer review (11), most are not trained in how to write a reviewers' report. Instead,  
5 89 reviewing is often a skill learnt through feedback received on their own submitted manuscripts (12).  
6 90 Furthermore, since it is rare for reviewers to receive feedback on their own reviewer reports, it is difficult  
7 91 for them to know whether their reviews are of good quality (13).  
8 92

9 93 Although journals, authors and reviewers widely support peer review as the primary tool for evaluating  
10 94 research outputs in biomedical research (11,14,15), there is concurrently a broad consensus across scientific  
11 95 disciplines that the peer review process may be flawed (12,16,17). A growing body of literature has  
12 96 identified several potential problems including misjudgment by editors, and biased, inconsistent or  
13 97 inadequate reviewing by reviewers (17).

14 98 Over the years, there have been various attempts to improve the quality of peer reviewer reports in  
15 99 biomedical science. A recent systematic review evaluating the impact of interventions aimed at improving  
16 100 the quality of peer review of Randomized Controlled Trials (RCTs) for biomedical publications concluded  
17 101 that there is a need to clarify the roles and tasks of peer reviewers as a step forward in quality improvement  
18 102 of peer reviewing (18). Within the biomedical field, the apparent roles and tasks of peer reviewers are  
19 103 closely related to the structural properties of the editorial process itself. For example, some - but not all -  
20 104 journals require peer reviewers to assess novelty and/or clinical relevance of articles in addition to assessing  
21 105 scientific rigor. Journals also differ with regards to their expectations of how a reviewer report should be  
22 106 written. Some journals encourage reviewers to follow a specific structure in their reporting, whereas other  
23 107 journals prefer free text. Journals also differ in their request for peer reviewer recommendations regarding  
24 108 whether an article should be accepted for publication in the journal or not.

25 109 These differences may influence quality of peer review reporting, and thus quality of the peer review  
26 110 process across journals. An RCT aimed at determining the effects of training peer reviewers found only a  
27 111 slight positive impact on the quality of peer review. After receiving training, the quality of the peer  
28 112 reviewers' reports as measured by the 'Review Quality Instrument' that assesses the extent to which a  
29 113 reviewer has commented on five aspects of a manuscript (importance of the research question, originality of  
30 114 the paper, strengths and weaknesses of the method, presentation, interpretation of results) and on two  
31 115 aspects of the review (constructiveness and substantiation of comments), was deemed to have improved  
32 116 overall. However, peer reviewers in the study failed to detect all major errors that were introduced to the  
33 117 articles under review (19). At the same time, a major criticism of this study was that reviewers do not  
34 118 necessarily think that their task is to find all major errors in an article (20). This dissonance was also  
35 119 reflected in a recent study that showed that the most important tasks in peer review, as perceived by peer  
36 120 reviewers evaluating RCTs, were not congruent with the tasks most often requested by journal editors in  
37 121 their guidelines to reviewers (21).

38 122 These differences clearly illustrate the need to clarify the roles and tasks of peer reviewers. Thus far, this  
39 123 has only been somewhat explored, to a limited extent, for RCTs (21) but not for other study designs.

40 124 The primary objective of this research is to determine the specific roles and tasks of peer reviewers as  
41 125 depicted in biomedical research. The wider purpose of this research is to inform and facilitate the future  
42 126 development of a set of core tasks that should be (asked of peer reviewers) carried out by peer reviewers.  
43 127 This will contribute to improvements in the quality of peer reviewer reports, and ultimately of the  
44 128 biomedical scientific literature in general.  
45 129  
46 130

## 131 *Methods*

132 A scoping review was considered to be the most suitable approach to responding to the broad aim of this  
 133 study. In contrast to systematic literature reviews that aim to answer specific questions, scoping reviews  
 134 have been described as a process of producing a broad overview of the field (22–24). This will be achieved  
 135 through a scoping review of both published biomedical journal articles and grey literature. Grey literature  
 136 will be searched because it is likely that most of the information being sought (i.e. descriptions of the roles  
 137 of peer reviewers) would be found in calls for reviewers on journal websites; and guidance documents – all  
 138 of which would not generally be captured in a traditional review of published research. This approach has  
 139 been previously adopted by authors of a study that aimed to identify competencies of scientific editors of  
 140 biomedical journals (9). We used the Preferred Reporting Items for Systematic Reviews and Meta-analysis  
 141 for Protocols (PRISMA-P) to draft this protocol (25).

142 This scoping review will use the methodological framework proposed by Arksey and O'Malley (22), as  
 143 well as the amendments made to this framework by Levac (26) and by the Joanna Briggs Institute (27). The  
 144 framework consists of six consecutive stages: 1. Identifying the research question 2. Identifying relevant  
 145 studies, 3. Study selection, 4. Charting the data 5. Collating, summarizing, and reporting results and 6.  
 146 Consultation. Each stage is discussed in further detail below.

### 148 *Stage 1: Identifying the research question*

149 Arksey and O'Malley suggest an iterative process for developing one or more research questions. In the  
 150 first stage two research questions have been identified based on gaps in the literature:

- 151 1. What are the expected roles of peer reviewers in the editorial peer review process in biomedical  
 152 journals?
- 153 2. What are the range of tasks that peer reviewers are expected to perform for biomedical journals?

154 Given that some overlap between the terms “roles” and “tasks” is expected, we defined “roles” as referring  
 155 to the overarching nature of peer reviewers' function, whereas “tasks” refer more specifically to actions that  
 156 fulfil these roles.

157  
 158 These questions might be refined, or new ones added, as the authors gain increasing familiarity with the  
 159 literature.

### 161 *Stage 2: Identifying relevant studies*

162 A comprehensive search strategy will be developed in order to identify relevant literature, underpinned by  
 163 key inclusion criteria (see Box 1). These are based on ‘Population – Concept – Context (PCC)’ framework  
 164 recommended by the Joanna Briggs Institute for scoping reviews (27), which has roots in the PICO  
 165 (Population, Intervention, Comparator and Outcome) framework commonly used to focus clinical questions  
 166 and develop systematic literature search strategies (28).

#### 168 **Box 1 Inclusion criteria**

|                                        |                                                                                                                                                                                                                                                                                                                                                                                                                                                                                                                                                                                                                     |
|----------------------------------------|---------------------------------------------------------------------------------------------------------------------------------------------------------------------------------------------------------------------------------------------------------------------------------------------------------------------------------------------------------------------------------------------------------------------------------------------------------------------------------------------------------------------------------------------------------------------------------------------------------------------|
| 169<br>170<br>171<br>172<br>173<br>174 | P – Population = Journal editors, publishers, peer reviewers, (corresponding) authors in biomedical journals, and<br>organizations that offer (educational) resources and training to peer reviewers in the biomedical<br>field<br>C – Concept = Articles with specific focus and/or statements mentioning roles, tasks, competencies pertaining to<br>the role of peer reviewers in the journal editorial process.<br>C – Context = The review will include all study designs as well as book chapters, editorials and commentaries<br>from the biomedical field. There will be no date and language restrictions. |
|----------------------------------------|---------------------------------------------------------------------------------------------------------------------------------------------------------------------------------------------------------------------------------------------------------------------------------------------------------------------------------------------------------------------------------------------------------------------------------------------------------------------------------------------------------------------------------------------------------------------------------------------------------------------|



1  
2  
3  
4  
5  
6  
7  
8  
9  
10  
11  
12  
13  
14  
15  
16  
17  
18  
19  
20  
21  
22  
23  
24  
25  
26  
27  
28  
29  
30  
31  
32  
33  
34  
35  
36  
37  
38  
39  
40  
41  
42  
43  
44  
45  
46  
47  
48  
49  
50  
51  
52  
53  
54  
55  
56  
57  
58  
59  
60

175

**Exclusion criteria**

177 Studies referring to peer review that is not related to manuscript peer reviewing in biomedical journals (e.g.  
178 grant peer review, professional performance review, peer review of teaching etc.) were excluded.

179

**Search strategy**

181 The electronic literature search strategy will follow the three-step process recommended by the Joanna  
182 Briggs Institute (27). The first step consisted of an initial preliminary search of at least two online  
183 databases relevant to the topic. This was undertaken for MEDLINE (via Ovid) using the “peer review,  
184 research” Medical Subject Headings (MeSH) and ‘peer review’ key word in the Cochrane Library resulting  
185 in 2,017 studies in CDSR and 13,717 in MEDLINE. In the second step, we will closely review potentially  
186 relevant text words in the titles and abstracts of the most pertinent papers in order to compile a list of terms  
187 that can be used to inform our search strategy. Index terms used to describe the articles will also be  
188 included. This list will be combined with search strategies from existing scoping and systematic reviews on  
189 peer review (9,21,29) to develop database-specific search strategies.

190 The Peer Review of Electronic Search Strategies (PRESS) 2015 Guideline statement will be used to guide  
191 the electronic literature search strategies (30). These will be further refined in collaboration with a Health  
192 Sciences Librarian. Subsequently, the following databases will be searched: Cochrane Library, Cumulative  
193 Index to Nursing and Allied Health Literature (CINAHL); Educational Resources Information Centre  
194 (ERIC); EMBASE (via Ovid); PsycINFO (via Ovid); MEDLINE (via Ovid), Scopus and Web of Science.  
195 The search strategy for MEDLINE can be found in the online supplementary (Appendix 1).

196 There will be no time or language restrictions. The authors involved in this protocol are in command of the  
197 following languages: Catalan, Croatian, English, French, German, Italian, Russian, and Spanish. Relevant  
198 articles identified in any other language will be translated.

199 In the third and last step the reference lists of included studies as well as websites of journals such as  
200 JAMA,

201 Nature and Science which display a strong interest in peer review as evidenced by numerous publications  
202 on the topic will be hand searched using key words related to peer review, as outlined in the MEDLINE  
203 strategy (i.e. ‘peer review’) to identify any additional literature that was not detected by the search strategy.

204 The search strategy for grey literature will include searching in websites of existing networks (i.e.  
205 EQUATOR Network, New Frontiers of Peer Review (PEERE)), biomedical journal publishers (i.e. BMJ  
206 Publishing Group, Elsevier, Springer Nature, Taylor & Frances, Wiley), and organizations that offer  
207 resources for reviewers (including educational courses, for example those provided by Cochrane (31)) and  
208 Publons (32)) Relevant blogs, newsletters (i.e. The METRICS Research Digest (33)), surveys and reports of  
209 authors/reviewer workshops will also be considered.

210

211 In addition we will review journal guidelines to peer reviewers on how to perform the manuscript review.

212 The guidelines will be searched for statements around the roles and tasks of peer reviewers.

213 Journals will be selected using 2016 journal impact factor (Thomson Reuters Journal Citation Reports-  
214 Science Citation Index Expanded). We will identify and assess the top five, middle five and lowest-ranking  
215 five journals across the medical specialties recognized in the Directive 2005/36/EC of the European  
216 Parliament and of the Council of 7 September 2005 (on the recognition of professional qualifications).

217

218

It is expected that some journals may directly communicate their instructions to peer reviewers via email or through their submission systems, rather than through publicly available instructions. In order to obtain the content of such instructions for examination we will contact the editor-in-chief and/or managing editor of the identified journals to request details of any 'direct to reviewer' guidance.

### Stage 3: Study selection

Following the execution of the search strategy, the identified records (titles and abstracts) will be collated in a reference manager for de-duplication. The final unique set of records will be imported into a systematic review paper manager that facilitates independent screening and logs disagreements between reviewers.

The study selection process will be implemented over two stages. The first stage will involve the screening of titles and abstracts by two reviewers (K.G. and D.C.) to determine each article's eligibility for full text screening based on *a-priori* inclusion criteria. The second stage of the selection process will consist of retrieving the full text of all potentially eligible articles, which will also be independently screened. Disagreements between reviewers regarding eligibility will be resolved by a third member of the research team (D.H.). Data will also be extracted independently by K.G. and D.C.

We expect that some of the grey literature might subsequently be published elsewhere in the indexed literature. This will be accounted for by cross-checking authors' names across grey literature and index literature results in order to identify potential duplicates.

An adapted version of the PRISMA flow diagram will be used to report final numbers in the resulting study publication once the review is completed. Reasons for exclusion will be recorded at the full-text review stage.

### Stage 4: Charting the data

A draft charting form (see Table 1) has been developed at the protocol stage to aid the collection and sorting of key pieces of information from the selected articles. It will be pilot-tested and refined during the full-text screening to capture detailed information on each study. The information from research based and non-research based publications will be collected in separate extraction forms. Additional categories that may emerge during data extraction will be added accordingly.

Another form will be developed for the extraction of information from the journal guidelines to peer reviewers. In addition to the general and specific descriptions of expectations and competencies of peer reviewers, variations according to journals and their peer review models (such as: single-blind peer review, double-blind peer review, open peer review, post-publication peer review) and whether peer reviewers have to provide specific recommendations (i.e. no revision, minor revision, major revision, reject) will be noted.

Table 1 Draft data charting form

| Study characteristics     | Extracted data                                                                                                                                                       |
|---------------------------|----------------------------------------------------------------------------------------------------------------------------------------------------------------------|
| General information       | First author' last name<br>Journal<br>Publication year<br>Study design<br>Publication type: journal article, editorial, conference abstract, grey literature, report |
| Definition of peer review | Underlying definition and conceptualization of                                                                                                                       |

|                                                                                      |                                                                |
|--------------------------------------------------------------------------------------|----------------------------------------------------------------|
|                                                                                      | the peer review process                                        |
| General and specific descriptions of expectations and competencies of peer reviewers | Abilities<br>Knowledge<br>Roles<br>Tasks<br>Training<br>Skills |

### Stage 5: Collating, summarizing and reporting the results

In order to create a useful summary of the data, we will combine all expectations and competency-related statements retrieved from all sources.

The general and specific descriptions of expectations and competencies of peer reviewers extracted from the different sources will be combined and de-duplicated, producing a list of unique statements. These will subsequently be organized into emerging categories. While the primary goal is to extract roles and tasks of peer reviewers, additional items related to particular abilities, knowledge, training and skills will also be extracted.

A checklist for reporting scoping reviews - the “Preferred Reporting Items for Systematic Reviews and Meta-Analysis: extension for Scoping Reviews (PRISMA-ScR)” is currently under development (34). If published by the time the scoping review is complete, the PRISMA-ScR will be used.

### Stage 6: Consultation

This final stage refers to consultation with stakeholders in the field of peer review to inform and validate findings from the scoping review. This has also been shown to be a knowledge translation activity and an important step in scoping reviews (35).

The consultation will take place with journal editors, as well as peer reviewers themselves, to explore their views and perspectives on the roles and tasks of peer reviewers. Results will be presented in detail in separate research papers.

### Dissemination

To the best of our knowledge this scoping review is the first attempt to systematically identify the roles (overarching nature of the work) and tasks (specific actions carried out to fulfil these roles) of peer reviewers involved in the manuscript review process in biomedical journals.

As a standalone research piece it will primarily be helpful to determine and highlight the different perspectives around the roles and tasks of peer reviewers, and will be relevant to a variety of audiences including editors, peer reviewers, and authors. It will also inform the consequent consultation with stakeholders, with the aim of developing a taxonomy of peer reviewers’ roles and tasks leading to the development of a set of core competencies for peer reviewers of biomedical journals. The study findings could further be used by journal editors to review their instructions to peer reviewers and develop/update training courses for peer reviewers.

### Ethics

This manuscript outlines a protocol for a scoping review that will undertake secondary data analysis and hence does not require ethical approval.

Ethical approval for the consultation stage will be sought separately.

1  
2  
3  
4  
5  
6  
7  
8  
9  
10  
11  
12  
13  
14  
15  
16  
17  
18  
19  
20  
21  
22  
23  
24  
25  
26  
27  
28  
29  
30  
31  
32  
33  
34  
35  
36  
37  
38  
39  
40  
41  
42  
43  
44  
45  
46  
47  
48  
49  
50  
51  
52  
53  
54  
55  
56  
57  
58  
59  
60

293  
294 **Acknowledgements** The authors would like to thank Dr. Dario Sambunjak and David Blanco de Tena-  
295 Dávila for providing advice during the writing of this protocol.

296  
297 **Contributors** All authors have made substantive intellectual contributions to the development of this  
298 protocol. KG, DH, EC, IB and DM jointly conceived the idea for the project. DC, EC, IB, DM and DH  
299 contributed to the study design and development of research questions. KG conceptualized the review  
300 approach and led the writing of the manuscript. DH led the supervision of the manuscript preparation.  
301 All authors provided detailed comments on earlier drafts, and approved this manuscript.

302  
303 **Funding** This project was supported by the European Union's Horizon 2020 research and innovation  
304 programme under the Marie Skłodowska-Curie grant agreement No 676207. The funders had no role in the  
305 study design, data collection and analysis, decision to publish, or preparation of the manuscripts.

306  
307 **Competing interests** None.

## References

1. Kronick DA. Peer review in 18th-century scientific journalism. *JAMA* [Internet]. 1990;263. Available from: <http://dx.doi.org/10.1001/jama.1990.03440100021002>
2. Harley D. Scholarly communication: cultural contexts, evolving models. *Science*. 2013 Oct 4;342(6154):80–2.
3. Jefferson T, Wager E, Davidoff F. Measuring the quality of editorial peer review. *JAMA* [Internet]. 2002;287. Available from: <http://dx.doi.org/10.1001/jama.287.21.2786>
4. Moher D, Glasziou P, Chalmers I, Nasser M, Bossuyt PM, Korevaar DA, et al. Increasing value and reducing waste in biomedical research: who's listening? *The Lancet*. 2016;387(10027):1573–86.
5. Kassirer JP, Champion EW. Peer review: crude and understudied, but indispensable. *Jama*. 1994;272(2):96–7.
6. Scarfe WC. Translation of the Scientific Method... Peer Review. *Oral Surg Oral Med Oral Pathol Oral Radiol Endodontology*. 2010;109(4):485–7.
7. Orleans L, Manchikanti L. Medical journal peer review: process and bias. *Pain Physician*. 2015;18:E1–14.
8. Kravitz RL, Franks P, Feldman MD. Editorial peer reviewers' recommendations at a general medical journal: are they reliable and do editors care? *PLoS One* [Internet]. 2010;5. Available from: <http://dx.doi.org/10.1371/journal.pone.0010072>
9. Galipeau J, Barbour V, Baskin P, Bell-Syer S, Cobey K, Cumpston M, et al. A scoping review of competencies for scientific editors of biomedical journals. *BMC Med*. 2016;14:16.
10. Moher D, Altman DG. Four Proposals to Help Improve the Medical Research Literature. *PLOS Med*. 2015 Sep 22;12(9):e1001864.
11. Mulligan A, Hall L, Raphael E. Peer review in a changing world: An international study measuring the attitudes of researchers. *J Am Soc Inf Sci Technol*. 2013;64(1):132–61.
12. Smith R. Peer review: a flawed process at the heart of science and journals. *J R Soc Med*. 2006 Apr;99(4):178–82.
13. Tite L, Schroter S. Why do peer reviewers decline to review? A survey. *J Epidemiol Community Health*. 2007;61(1):9–12.
14. Shattell MM, Chinn P, Thomas SP, Cowling WR. Authors' and editors' perspectives on peer review quality in three scholarly nursing journals. *J Nurs Scholarsh Off Publ Sigma Theta Tau Int Honor Soc Nurs*. 2010 Mar;42(1):58–65.
15. Godlee F, Jefferson T. Peer review in health sciences. *BMJ Books London*; 2003.

- 1  
2  
3 341 16. Wager E, Jefferson T. Shortcomings of peer review in biomedical journals. *Learn Publ.* 2001  
4 342 Oct 1;14(4):257–63.
- 5  
6  
7 343 17. Lee CJ, Sugimoto CR, Zhang G, Cronin B. Bias in peer review. *J Am Soc Inf Sci Technol.*  
8 344 2013 Jan 1;64(1):2–17.
- 9  
10 345 18. Bruce R, Chauvin A, Trinquart L, Ravaud P, Boutron I. Impact of interventions to improve the  
11 346 quality of peer review of biomedical journals: a systematic review and meta-analysis. *BMC*  
12 347 *Med.* 2016;14(1):85.
- 13  
14  
15 348 19. Schroter S, Black N, Evans S. Effects of training on quality of peer review: randomised  
16 349 controlled trial. *BMJ [Internet].* 2004;328. Available from:  
17 350 <http://dx.doi.org/10.1136/bmj.38023.700775.AE>
- 18  
19 351 20. PubPeer - What errors do peer reviewers detect, and does training improve their ability to  
20 352 detect them? [Internet]. [cited 2016 Nov 20]. Available from:  
21 353 <https://pubpeer.com/publications/54CDC9161958EBE471CC7A633C236B>
- 22  
23  
24 354 21. Chauvin A, Ravaud P, Baron G. The most important tasks for peer reviewers evaluating a  
25 355 randomized controlled trial are not congruent with the tasks most often requested by journal  
26 356 editors. *BMC Med [Internet].* 2015;13. Available from: [http://dx.doi.org/10.1186/s12916-015-](http://dx.doi.org/10.1186/s12916-015-0395-3)  
27 357 [0395-3](http://dx.doi.org/10.1186/s12916-015-0395-3)
- 28  
29  
30 358 22. Arksey H, O'Malley L. Scoping studies: towards a methodological framework. *Int J Soc Res*  
31 359 *Methodol.* 2005;8(1):19–32.
- 32  
33 360 23. Armstrong R, Hall BJ, Doyle J, Waters E. “Scoping the scope” of a cochrane review  
34 361 [Internet]. [cited 2016 Dec 7]. Available from: <http://jpubhealth.oxfordjournals.org>
- 35  
36 362 24. Moher D, Stewart L, Shekelle P. All in the Family: systematic reviews, rapid reviews, scoping  
37 363 reviews, realist reviews, and more. *Syst Rev.* 2015;4:183.
- 38  
39  
40 364 25. Shamseer L, Moher D, Clarke M, Ghersi D, Liberati A, Petticrew M, et al. Preferred reporting  
41 365 items for systematic review and meta-analysis protocols (PRISMA-P) 2015: elaboration and  
42 366 explanation. *BMJ.* 2015 Jan 2;349:g7647.
- 43  
44 367 26. Levac D, Colquhoun H, O'Brien KK. Scoping studies: advancing the methodology. *Implement*  
45 368 *Sci IS.* 2010 Sep 20;5:69.
- 46  
47  
48 369 27. Joanna Briggs Institute. The Joanna Briggs Institute Reviewers' Manual 2015. *Methodol JBI*  
49 370 *Scoping Rev Joanna Briggs Inst JBI.* 2015;
- 50  
51 371 28. Richardson WS, Wilson MC, Nishikawa J, Hayward RS. The well-built clinical question: a  
52 372 key to evidence-based decisions. *ACP J Club.* 1995 Dec;123(3):A12-13.
- 53  
54  
55 373 29. Larson BP, Chung KC. A systematic review of peer review for scientific manuscripts. *Hand N*  
56 374 *Y N.* 2012 Mar;7(1):37–44.
- 57  
58  
59  
60

1  
2  
3  
4  
5  
6  
7  
8  
9  
10  
11  
12  
13  
14  
15  
16  
17  
18  
19  
20  
21  
22  
23  
24  
25  
26  
27  
28  
29  
30  
31  
32  
33  
34  
35  
36  
37  
38  
39  
40  
41  
42  
43  
44  
45  
46  
47  
48  
49  
50  
51  
52  
53  
54  
55  
56  
57  
58  
59  
60

- 375 30. McGowan J, Sampson M, Salzwedel DM, Cogo E, Foerster V, Lefebvre C. PRESS Peer  
376 Review of Electronic Search Strategies: 2015 Guideline Statement. *J Clin Epidemiol*. 2016  
377 Jul;75:40–6.
- 378 31. Free Online Course on Journal Peer Review | Cochrane Eyes and Vision [Internet]. [cited 2017  
379 Feb 7]. Available from: /free-online-course-journal-peer-review
- 380 32. Home [Internet]. Publons. [cited 2017 Apr 3]. Available from: <http://home.publons.com/>
- 381 33. Research Digest | METRICS [Internet]. [cited 2017 Feb 21]. Available from:  
382 <http://metrics.stanford.edu/resources/research-digest>
- 383 34. Reporting guidelines under development | The EQUATOR Network [Internet]. [cited 2016  
384 Dec 21]. Available from: [http://www.equator-network.org/library/reporting-guidelines-under-](http://www.equator-network.org/library/reporting-guidelines-under-development/)  
385 [development/](http://www.equator-network.org/library/reporting-guidelines-under-development/)
- 386 35. Tricco AC, Lillie E, Zarin W, O'Brien K, Colquhoun H, Kastner M, et al. A scoping review on  
387 the conduct and reporting of scoping reviews. *BMC Med Res Methodol* [Internet]. 2016 Feb 9  
388 [cited 2016 Dec 17];16. Available from:  
389 <http://www.ncbi.nlm.nih.gov/pmc/articles/PMC4746911/>

## Additional file 1

**A scoping review protocol on the roles and tasks of peer reviewers in the manuscript review process in biomedical journals**

Databases: Ovid MEDLINE(R) Epub Ahead of Print, In-Process & Other Non-Indexed Citations, Ovid MEDLINE(R) Daily and Ovid MEDLINE(R) 1946 to Present (April 2017 Week 2)

|   |                                                                                                                                                                                                                                                                                                                                                                                                                                           |
|---|-------------------------------------------------------------------------------------------------------------------------------------------------------------------------------------------------------------------------------------------------------------------------------------------------------------------------------------------------------------------------------------------------------------------------------------------|
| 1 | ((reviewing or reviewer or peer reviewer or peer-revie* or peer review) adj5 (abilit* or aptitud* or capabilit* or capacit* or character* or competen* or criteri* or educat* or effectiv* or evaluat* or expertise or integrit* or knowledg* or learning or proficien* or qualifi* or qualify or recommend* or responsibilit* or role or roles or skill or skills or standard or standards or talent* or task or tasks or training)).tw. |
| 2 | exp *peer review, research/                                                                                                                                                                                                                                                                                                                                                                                                               |
| 3 | professional competence/                                                                                                                                                                                                                                                                                                                                                                                                                  |
| 4 | responsibility/                                                                                                                                                                                                                                                                                                                                                                                                                           |
| 5 | 3 or 4                                                                                                                                                                                                                                                                                                                                                                                                                                    |
| 6 | 2 and 5                                                                                                                                                                                                                                                                                                                                                                                                                                   |
| 7 | 1 or 6                                                                                                                                                                                                                                                                                                                                                                                                                                    |

4821 [MEDLINE UNIQUE HITS]



## PRISMA-P 2015 Checklist

This checklist has been adapted for use with protocol submissions to *Systematic Reviews* from Table 3 in Moher D et al: Preferred reporting items for systematic review and meta-analysis protocols (PRISMA-P) 2015 statement. *Systematic Reviews* 2015 4:1

| Section/topic                     | #  | Checklist item                                                                                                                                                                                  | Information reported                |                          | Line number(s) |
|-----------------------------------|----|-------------------------------------------------------------------------------------------------------------------------------------------------------------------------------------------------|-------------------------------------|--------------------------|----------------|
|                                   |    |                                                                                                                                                                                                 | Yes                                 | No                       |                |
| <b>ADMINISTRATIVE INFORMATION</b> |    |                                                                                                                                                                                                 |                                     |                          |                |
| <b>Title</b>                      |    |                                                                                                                                                                                                 |                                     |                          |                |
| Identification                    | 1a | Identify the report as a protocol of a systematic review                                                                                                                                        | <input checked="" type="checkbox"/> | <input type="checkbox"/> | 1              |
| Update                            | 1b | If the protocol is for an update of a previous systematic review, identify as such                                                                                                              | <input type="checkbox"/>            | <input type="checkbox"/> | NA             |
| <b>Registration</b>               | 2  | If registered, provide the name of the registry (e.g., PROSPERO) and registration number in the Abstract                                                                                        | <input type="checkbox"/>            | <input type="checkbox"/> | NA             |
| <b>Authors</b>                    |    |                                                                                                                                                                                                 |                                     |                          |                |
| Contact                           | 3a | Provide name, institutional affiliation, and e-mail address of all protocol authors; provide physical mailing address of corresponding author                                                   | <input checked="" type="checkbox"/> | <input type="checkbox"/> | 4-22           |
| Contributions                     | 3b | Describe contributions of protocol authors and identify the guarantor of the review                                                                                                             | <input checked="" type="checkbox"/> | <input type="checkbox"/> | 295-299        |
| <b>Amendments</b>                 | 4  | If the protocol represents an amendment of a previously completed or published protocol, identify as such and list changes; otherwise, state plan for documenting important protocol amendments | <input type="checkbox"/>            | <input type="checkbox"/> | NA             |
| <b>Support</b>                    |    |                                                                                                                                                                                                 |                                     |                          |                |
| Sources                           | 5a | Indicate sources of financial or other support for the review                                                                                                                                   | <input checked="" type="checkbox"/> | <input type="checkbox"/> | 301-302        |
| Sponsor                           | 5b | Provide name for the review funder and/or sponsor                                                                                                                                               | <input checked="" type="checkbox"/> | <input type="checkbox"/> | 301-302        |
| Role of sponsor/funder            | 5c | Describe roles of funder(s), sponsor(s), and/or institution(s), if any, in developing the protocol                                                                                              | <input checked="" type="checkbox"/> | <input type="checkbox"/> | 302-303        |
| <b>INTRODUCTION</b>               |    |                                                                                                                                                                                                 |                                     |                          |                |
| <b>Rationale</b>                  | 6  | Describe the rationale for the review in the context of what is already known                                                                                                                   | <input checked="" type="checkbox"/> | <input type="checkbox"/> | 62-128         |
| <b>Objectives</b>                 | 7  | Provide an explicit statement of the question(s) the review will address with reference to participants, interventions, comparators, and outcomes (PICO)                                        | <input checked="" type="checkbox"/> | <input type="checkbox"/> | 162-173        |

| Section/topic                      | #   | Checklist item                                                                                                                                                                                                                              | Information reported                |                          | Line number(s)    |
|------------------------------------|-----|---------------------------------------------------------------------------------------------------------------------------------------------------------------------------------------------------------------------------------------------|-------------------------------------|--------------------------|-------------------|
|                                    |     |                                                                                                                                                                                                                                             | Yes                                 | No                       |                   |
| <b>METHODS</b>                     |     |                                                                                                                                                                                                                                             |                                     |                          |                   |
| Eligibility criteria               | 8   | Specify the study characteristics (e.g., PICO, study design, setting, time frame) and report characteristics (e.g., years considered, language, publication status) to be used as criteria for eligibility for the review                   | <input checked="" type="checkbox"/> | <input type="checkbox"/> | 168-178           |
| Information sources                | 9   | Describe all intended information sources (e.g., electronic databases, contact with study authors, trial registers, or other grey literature sources) with planned dates of coverage                                                        | <input checked="" type="checkbox"/> | <input type="checkbox"/> | 181-221           |
| Search strategy                    | 10  | Present draft of search strategy to be used for at least one electronic database, including planned limits, such that it could be repeated                                                                                                  | <input checked="" type="checkbox"/> | <input type="checkbox"/> | 195 (Appendix 1)  |
| <b>STUDY RECORDS</b>               |     |                                                                                                                                                                                                                                             |                                     |                          |                   |
| Data management                    | 11a | Describe the mechanism(s) that will be used to manage records and data throughout the review                                                                                                                                                | <input checked="" type="checkbox"/> | <input type="checkbox"/> | 224-226           |
| Selection process                  | 11b | State the process that will be used for selecting studies (e.g., two independent reviewers) through each phase of the review (i.e., screening, eligibility, and inclusion in meta-analysis)                                                 | <input checked="" type="checkbox"/> | <input type="checkbox"/> | 227-232           |
| Data collection process            | 11c | Describe planned method of extracting data from reports (e.g., piloting forms, done independently, in duplicate), any processes for obtaining and confirming data from investigators                                                        | <input checked="" type="checkbox"/> | <input type="checkbox"/> | 240-249           |
| Data items                         | 12  | List and define all variables for which data will be sought (e.g., PICO items, funding sources), any pre-planned data assumptions and simplifications                                                                                       | <input checked="" type="checkbox"/> | <input type="checkbox"/> | 252-253 (Table 1) |
| Outcomes and prioritization        | 13  | List and define all outcomes for which data will be sought, including prioritization of main and additional outcomes, with rationale                                                                                                        | <input checked="" type="checkbox"/> | <input type="checkbox"/> | 260-262           |
| Risk of bias in individual studies | 14  | Describe anticipated methods for assessing risk of bias of individual studies, including whether this will be done at the outcome or study level, or both; state how this information will be used in data synthesis                        | <input type="checkbox"/>            | <input type="checkbox"/> | NA                |
| <b>DATA</b>                        |     |                                                                                                                                                                                                                                             |                                     |                          |                   |
| Synthesis                          | 15a | Describe criteria under which study data will be quantitatively synthesized                                                                                                                                                                 | <input type="checkbox"/>            | <input type="checkbox"/> | NA                |
|                                    | 15b | If data are appropriate for quantitative synthesis, describe planned summary measures, methods of handling data, and methods of combining data from studies, including any planned exploration of consistency (e.g., $I^2$ , Kendall's tau) | <input type="checkbox"/>            | <input type="checkbox"/> | NA                |
|                                    | 15c | Describe any proposed additional analyses (e.g., sensitivity or subgroup analyses, meta-regression)                                                                                                                                         | <input type="checkbox"/>            | <input type="checkbox"/> | NA                |
|                                    | 15d | If quantitative synthesis is not appropriate, describe the type of summary planned                                                                                                                                                          | <input checked="" type="checkbox"/> | <input type="checkbox"/> | 256-260           |

1  
2  
3  
4  
5  
6  
7  
8  
9  
10  
11  
12  
13  
14  
15  
16  
17  
18  
19  
20  
21  
22  
23  
24  
25  
26  
27  
28  
29  
30  
31  
32  
33  
34  
35  
36  
37  
38  
39  
40  
41  
42  
43  
44  
45  
46  
47

| Section/topic                     | #  | Checklist item                                                                                                              | Information reported     |                          | Line number(s) |
|-----------------------------------|----|-----------------------------------------------------------------------------------------------------------------------------|--------------------------|--------------------------|----------------|
|                                   |    |                                                                                                                             | Yes                      | No                       |                |
| Meta-bias(es)                     | 16 | Specify any planned assessment of meta-bias(es) (e.g., publication bias across studies, selective reporting within studies) | <input type="checkbox"/> | <input type="checkbox"/> | NA             |
| Confidence in cumulative evidence | 17 | Describe how the strength of the body of evidence will be assessed (e.g., GRADE)                                            | <input type="checkbox"/> | <input type="checkbox"/> | NA             |

For peer review only
