# Supplementary material for: A scoping review protocol on the roles and tasks of peer reviewers in the manuscript review process in biomedical journals
Source: PubMed Central journal article supplement — BMJ Open. 2017 Oct 22;7(10):e017468. doi: 10.1136/bmjopen-2017-017468 (PMC5665269; doi:10.1136/bmjopen-2017-017468), 2017-10-22
Supplement: bmjopen-2017-017468supp001.pdf [file bmjopen-2017-017468supp001.pdf]

**Additional file 1**

**A scoping review protocol on the roles and tasks of peer reviewers in the manuscript review process in biomedical journals**

Databases: Ovid MEDLINE(R) Epub Ahead of Print, In-Process & Other Non-Indexed Citations, Ovid MEDLINE(R) Daily and Ovid MEDLINE(R) 1946 to Present (April 2017 Week 2)

|   |                                                                                                                                                                                                                                                                                                                                                                                                                                           |
|---|-------------------------------------------------------------------------------------------------------------------------------------------------------------------------------------------------------------------------------------------------------------------------------------------------------------------------------------------------------------------------------------------------------------------------------------------|
| 1 | ((reviewing or reviewer or peer reviewer or peer-revie* or peer review) adj5 (abilit* or aptitud* or capabilit* or capacit* or character* or competen* or criteri* or educat* or effectiv* or evaluat* or expertise or integrit* or knowledg* or learning or proficien* or qualifi* or qualify or recommend* or responsibilit* or role or roles or skill or skills or standard or standards or talent* or task or tasks or training)).tw. |
| 2 | exp *peer review, research/                                                                                                                                                                                                                                                                                                                                                                                                               |
| 3 | professional competence/                                                                                                                                                                                                                                                                                                                                                                                                                  |
| 4 | responsibility/                                                                                                                                                                                                                                                                                                                                                                                                                           |
| 5 | 3 or 4                                                                                                                                                                                                                                                                                                                                                                                                                                    |
| 6 | 2 and 5                                                                                                                                                                                                                                                                                                                                                                                                                                   |
| 7 | 1 or 6                                                                                                                                                                                                                                                                                                                                                                                                                                    |

**4821** [MEDLINE UNIQUE HITS]
